# Supplementary material for: Global Characterization of Peripheral B Cells in Parkinson’s Disease by Single-Cell RNA and BCR Sequencing
Source: Front Immunol. 2022 Feb 16;13:814239. doi: 10.3389/fimmu.2022.814239 (PMC8888848; doi:10.3389/fimmu.2022.814239)
Supplement: Supplementary Table 2 — Differentially expressed genes and functionally enriched GO terms and KEGG pathways between PD patients and healthy controls in each B cell cluster. [file Table_2.xlsx]

## Sheet: DE genes (PD vs HC)
gene	avg_logFC	pct.1	pct.2	p_val	p_val_adj
Naive1 (up-regulated genes)
RPS26	1.90793	0.961	0.75	8.31747e-169	1.5409e-164
AC004057.1	0.702213	0.367	0.05	3.35524e-48	6.21592e-44
RPL23A	0.318159	0.993	0.961	1.56303e-38	2.89567e-34
HLA-DRB5	0.29927	0.998	1	3.43783e-34	6.36892e-30
MT-ATP8	0.306024	0.928	0.852	3.79887e-22	7.03779e-18
EEF1A1P5	0.360978	0.736	0.506	4.60049e-20	8.52286e-16
HLA-DQA2	0.500459	0.694	0.674	4.87617e-19	9.03359e-15
AP001324.1	0.382974	0.62	0.403	9.48384e-19	1.75698e-14
AC025750.2	0.305567	0.093	0.002	7.92405e-15	1.46801e-10
AC090498.1	0.26041	0.814	0.657	2.10634e-13	3.9022e-09
DUSP1	0.462148	0.362	0.222	1.01088e-10	1.87276e-06
IGHV7-4-1	0.958523	0.03	0.006	0.000911369	1
IGLV3-10	0.543184	0.024	0.003	0.00109338	1
Naive1 (down-regulated genes)
AL031733.2	-0.473234	0.441	0.68	9.38228e-35	1.73816e-30
AL034397.3	-0.395038	0.078	0.22	8.31742e-20	1.54088e-15
FXYD5	-0.273304	0.915	0.94	3.45734e-19	6.40506e-15
ZFP36L2	-0.275327	0.675	0.811	2.32669e-13	4.31043e-09
RPS15A	-0.264876	0.709	0.784	2.36209e-13	4.37601e-09
SMDT1	-0.277824	0.564	0.698	3.20195e-13	5.93194e-09
RPL9P9	-0.330892	0.191	0.329	5.65771e-13	1.04815e-08
MTATP6P1	-0.258057	0.736	0.822	1.2459e-12	2.30815e-08
DEGS1	-0.257714	0.266	0.375	1.38375e-08	0.000256354
PLCG2	-0.268302	0.292	0.394	8.94885e-08	0.00165786
JAK1	-0.258325	0.491	0.569	2.29249e-07	0.00424707
AHNAK	-0.281821	0.23	0.313	4.22461e-06	0.0782651
MYH9	-0.251937	0.469	0.529	5.99841e-06	0.111127
IGHV5-10-1	-1.20871	0.002	0.022	2.29252e-05	0.424713
HIST1H1E	-0.28694	0.251	0.331	5.49498e-05	1
Naive2 (up-regulated genes)
RPS26	1.75232	0.946	0.821	3.36472e-69	6.23348e-65
AC004057.1	0.737912	0.394	0.041	4.66463e-61	8.64169e-57
RPS23	0.257512	1	0.998	7.96786e-38	1.47613e-33
IGHA1	0.64889	0.217	0.018	4.62225e-35	8.56317e-31
HLA-DRB5	0.3853	1	0.997	1.36577e-30	2.53023e-26
CD27	0.3229	0.16	0.018	7.62895e-23	1.41334e-18
RPL23A	0.293219	0.984	0.948	7.8363e-23	1.45175e-18
TNFRSF13B	0.291359	0.207	0.039	6.63865e-22	1.22988e-17
IGHG2	0.566001	0.389	0.163	6.08017e-20	1.12641e-15
AIM2	0.332512	0.166	0.027	1.63342e-19	3.02608e-15
IGHG1	0.41012	0.228	0.064	2.90483e-17	5.38148e-13
AL928742.1	0.438594	0.312	0.118	3.51965e-17	6.52051e-13
HLA-DQA2	0.483079	0.736	0.742	3.63013e-14	6.72517e-10
LINC01857	0.398922	0.399	0.203	4.4919e-13	8.32169e-09
MT-ATP8	0.258895	0.935	0.818	6.5571e-13	1.21477e-08
RPL27A	0.258724	0.905	0.823	3.12665e-12	5.79242e-08
CD24	0.340111	0.533	0.348	1.21537e-10	2.25159e-06
EEF1A1P5	0.270748	0.78	0.619	1.74911e-09	3.2404e-05
TUBA1B	0.256928	0.652	0.47	1.19777e-08	0.000221899
IGHG3	0.323679	0.345	0.218	1.50897e-06	0.0279551
CD69	0.400175	0.432	0.338	9.32151e-05	1
IGKV3D-11	0.66893	0.024	0.004	0.00100865	1
IGLV3-10	0.651529	0.03	0.008	0.0018073	1
IGHV3-20	0.391412	0.03	0.008	0.00182228	1
IGHV4-61	0.453597	0.052	0.023	0.00568308	1
IGKV6-21	0.493648	0.019	0.004	0.00879831	1
Naive2 (down-regulated genes)
TCL1A	-0.362965	0.728	0.925	5.23174e-17	9.69232e-13
AL031733.2	-0.42432	0.454	0.646	1.78012e-16	3.29784e-12
IL4R	-0.490435	0.427	0.618	3.36638e-15	6.23656e-11
RPL9P9	-0.439928	0.212	0.403	2.9218e-13	5.41293e-09
AL034397.3	-0.38784	0.054	0.208	6.74492e-12	1.24956e-07
PLPP5	-0.356497	0.609	0.703	5.93376e-10	1.09929e-05
P2RY14	-0.254874	0.06	0.162	7.52358e-07	0.0139382
IGHD	-0.289097	0.582	0.651	8.6851e-07	0.01609
NSD3	-0.294846	0.478	0.558	1.41272e-06	0.0261721
SARAF	-0.258221	0.478	0.559	2.38186e-06	0.0441263
DBNDD1	-0.279603	0.147	0.259	5.03186e-06	0.0932202
ADK	-0.253675	0.5	0.592	1.06507e-05	0.197315
CNTNAP2	-0.264006	0.065	0.152	1.38957e-05	0.257431
HIST1H1E	-0.34867	0.266	0.367	3.11054e-05	0.576259
IGLL5	-0.277291	0.141	0.244	3.63782e-05	0.673943
DEGS1	-0.308139	0.255	0.335	8.84519e-05	1
APLP2	-0.25686	0.299	0.385	0.000156806	1
NT5E	-0.260973	0.179	0.265	0.000320824	1
MYH9	-0.258951	0.53	0.564	0.000495366	1
ADAM19	-0.258271	0.269	0.338	0.000682362	1
RPL13P12	-0.281177	0.367	0.466	0.00073664	1
Naive3 (up-regulated genes)
RPS26	1.96326	0.931	0.716	8.33298e-74	1.54377e-69
AC004057.1	0.70975	0.413	0.042	6.29168e-40	1.1656e-35
RPS23	0.288911	1	0.989	7.21079e-35	1.33587e-30
RPL41	0.252246	1	0.998	7.8058e-24	1.4461e-19
RPL23A	0.305672	0.978	0.911	1.64811e-18	3.05329e-14
MT-ATP8	0.297277	0.966	0.865	2.50396e-15	4.63884e-11
CD24	0.409589	0.536	0.304	2.13424e-12	3.95388e-08
PPIAP22	0.310944	0.855	0.727	2.71688e-12	5.03328e-08
AP001324.1	0.368764	0.617	0.404	1.13911e-11	2.11031e-07
EEF1A1P5	0.295111	0.705	0.543	4.1089e-09	7.61214e-05
IGHA1	0.268555	0.108	0.022	1.83499e-07	0.00339951
AC090498.1	0.260858	0.828	0.674	3.3898e-07	0.00627994
IFT57	0.283154	0.459	0.328	1.25644e-05	0.232767
HLA-DQA2	0.396871	0.614	0.681	0.000157616	1
DUSP1	0.280531	0.403	0.31	0.00237804	1
IGHV3-33	0.645468	0.066	0.029	0.0088177	1
IGHV7-4-1	0.853363	0.042	0.013	0.00959182	1
IGKV6-21	0.263124	0.015	0	0.00973575	1
Naive3 (down-regulated genes)
AL031733.2	-0.453855	0.479	0.696	1.53823e-15	2.84972e-11
BACH2	-0.389485	0.646	0.752	1.73338e-09	3.21126e-05
ENSG00000278048-RF00004	-0.472333	0.108	0.264	3.05324e-09	5.65644e-05
RALGPS2	-0.375613	0.676	0.767	1.84861e-08	0.000342474
SETD2	-0.357879	0.287	0.435	1.07955e-07	0.00199998
AL034397.3	-0.309278	0.081	0.208	1.26564e-07	0.00234472
RPL9P9	-0.293511	0.194	0.348	1.30748e-07	0.00242224
JAK1	-0.277043	0.607	0.725	2.45839e-07	0.00455442
SNX29	-0.314604	0.499	0.634	2.50945e-07	0.00464901
MYH9	-0.313732	0.604	0.71	8.15599e-07	0.0151098
SMCHD1	-0.341576	0.646	0.723	1.01457e-06	0.0187959
RNU5F-1	-0.425936	0.118	0.239	1.57537e-06	0.0291852
PARP14	-0.331429	0.324	0.452	2.43862e-06	0.0451779
HIST1H1E	-0.373006	0.521	0.667	2.77695e-06	0.0514457
TPD52	-0.352634	0.199	0.324	3.8322e-06	0.0709954
SIPA1L1	-0.339222	0.3	0.426	4.4161e-06	0.0818128
PARP1	-0.275234	0.536	0.641	4.87057e-06	0.0902322
ZCCHC11	-0.348928	0.295	0.421	6.27077e-06	0.116172
RBL2	-0.278778	0.283	0.417	6.51815e-06	0.120755
COL19A1	-0.322654	0.462	0.579	6.76847e-06	0.125393
KHDRBS2	-0.284951	0.184	0.308	7.03858e-06	0.130397
ZZEF1	-0.266164	0.066	0.16	1.12406e-05	0.208244
PHF3	-0.341092	0.381	0.497	1.33215e-05	0.246794
GTF2I	-0.284795	0.179	0.29	1.62807e-05	0.301616
CCDC91	-0.259738	0.118	0.222	1.69442e-05	0.313908
DGKD	-0.321607	0.3	0.424	2.08388e-05	0.38606
RCAN3	-0.293636	0.143	0.244	3.75171e-05	0.695042
MAML2	-0.316032	0.224	0.339	4.04732e-05	0.749806
MICAL1	-0.294402	0.165	0.271	4.22291e-05	0.782337
HIST1H1D	-0.257998	0.179	0.297	4.95842e-05	0.918598
TCF12	-0.30277	0.192	0.302	5.33152e-05	0.987717
AKAP13	-0.270592	0.428	0.517	6.66782e-05	1
SENP7	-0.320339	0.177	0.277	7.7247e-05	1
UVRAG	-0.251193	0.3	0.41	7.86352e-05	1
ENSG00000273727-RF00003	-0.342226	0.032	0.098	8.716e-05	1
RB1	-0.258918	0.388	0.492	0.000239991	1
CAST	-0.280943	0.477	0.57	0.00030045	1
RBM33	-0.275652	0.187	0.284	0.000303547	1
MIS18BP1	-0.311615	0.339	0.426	0.000325318	1
TLK1	-0.278414	0.231	0.328	0.000355499	1
MYCBP2	-0.251273	0.506	0.59	0.000364364	1
NCOR1	-0.276374	0.533	0.583	0.000403035	1
ADAM19	-0.255693	0.351	0.446	0.000439209	1
FNBP1	-0.258252	0.295	0.39	0.000467887	1
PAK2	-0.271073	0.391	0.477	0.000512289	1
ATRX	-0.252176	0.506	0.585	0.000516024	1
ATF7IP	-0.279916	0.491	0.561	0.000604099	1
PARP4	-0.259577	0.108	0.184	0.000638472	1
ATP2B1	-0.252256	0.356	0.439	0.000806663	1
TLE1	-0.268739	0.177	0.264	0.000891552	1
SLC12A6	-0.267324	0.174	0.253	0.00130318	1
CAMK2D	-0.251263	0.418	0.497	0.00147398	1
ARHGEF7	-0.256536	0.177	0.253	0.00165168	1
PLCG2	-0.251802	0.381	0.448	0.00168099	1
NT5E	-0.265674	0.292	0.368	0.00180098	1
RNU5A-1	-0.251066	0.184	0.259	0.00662984	1
DOCK2	-0.258641	0.278	0.339	0.00967737	1
Naive4 (up-regulated genes)
RPS26	1.72325	0.968	0.849	6.56525e-76	1.21628e-71
HLA-DRB5	0.399706	1	0.997	6.28498e-21	1.16436e-16
AC004057.1	0.558954	0.379	0.087	1.26397e-19	2.34162e-15
RPL23A	0.31874	0.992	0.963	1.79703e-18	3.32917e-14
MT-ATP8	0.344601	0.934	0.846	5.73084e-14	1.0617e-09
HLA-DQA2	0.529024	0.703	0.732	2.15835e-10	3.99855e-06
AC025750.2	0.310399	0.1	0	1.87606e-08	0.000347559
AP001324.1	0.288757	0.712	0.528	1.01656e-07	0.00188328
EEF1A1P5	0.265714	0.761	0.605	2.80723e-07	0.00520067
SRSF3	0.295902	0.581	0.421	1.42305e-06	0.0263634
DUSP1	0.455966	0.496	0.365	2.35956e-05	0.437132
IGHV7-4-1	1.35392	0.051	0.003	0.000290341	1
MYO7B	0.261382	0.269	0.174	0.000648489	1
CD69	0.261056	0.443	0.361	0.00170434	1
Naive4 (down-regulated genes)
RPS15A	-0.349408	0.771	0.853	2.68333e-14	4.97113e-10
AL031733.2	-0.419026	0.506	0.716	1.34429e-11	2.49043e-07
RPL9P9	-0.339034	0.193	0.398	3.17368e-10	5.87956e-06
AL034397.3	-0.348785	0.076	0.234	5.34089e-10	9.89452e-06
SMDT1	-0.26574	0.6	0.783	1.8728e-08	0.000346954
RCSD1	-0.298922	0.612	0.726	2.86357e-06	0.0530506
NME4	-0.300488	0.142	0.274	3.13098e-06	0.0580045
RALGPS2	-0.291621	0.612	0.729	3.97815e-06	0.0736991
SETX	-0.277454	0.235	0.391	1.04503e-05	0.193603
JAK1	-0.259541	0.513	0.656	4.165e-05	0.771607
RUBCNL	-0.251522	0.498	0.639	5.10162e-05	0.945126
MYCBP2	-0.261001	0.396	0.528	6.03676e-05	1
IGHV5-10-1	-1.47075	0	0.033	6.45251e-05	1
PAK2	-0.284365	0.352	0.482	0.000119451	1
SPTAN1	-0.280071	0.258	0.378	0.000219522	1
HIST1H1E	-0.315241	0.269	0.388	0.000253713	1
KTN1	-0.276001	0.392	0.512	0.000363483	1
ZFP36L2	-0.251925	0.648	0.726	0.000367013	1
PCM1	-0.263926	0.233	0.344	0.000406954	1
ATF7IP	-0.271589	0.347	0.455	0.000589028	1
AHNAK	-0.284084	0.428	0.525	0.00175003	1
IGLV1-51	-0.832799	0.036	0.087	0.00243125	1
USM1 (up-regulated genes)
RPS26	1.85754	0.977	0.846	1.53756e-111	2.84849e-107
AC004057.1	0.634547	0.42	0.079	8.58791e-40	1.591e-35
RPL23A	0.274333	0.995	0.963	4.50359e-29	8.34336e-25
AL928742.1	0.385575	0.724	0.491	7.80938e-18	1.44677e-13
NCF1	0.281042	0.671	0.46	1.56487e-13	2.89908e-09
CD24	0.285252	0.752	0.606	2.70786e-10	5.01657e-06
HIST1H2AC	0.306241	0.296	0.165	7.91693e-09	0.000146669
HLA-DQA2	0.455088	0.583	0.637	1.00949e-06	0.0187018
USM1 (down-regulated genes)
ENSG00000275291-RF00003	-0.559549	0.076	0.247	3.32614e-22	6.162e-18
ENSG00000273727-RF00003	-0.44586	0.033	0.159	2.17598e-20	4.03121e-16
RPS4Y1	-0.451977	0.265	0.502	1.51838e-18	2.81295e-14
RNU5A-1	-0.438313	0.125	0.286	6.79021e-16	1.25795e-11
RPL9P9	-0.340536	0.229	0.41	1.34469e-15	2.49117e-11
AHNAK	-0.395409	0.634	0.742	2.08497e-12	3.86262e-08
RNU5F-1	-0.422592	0.085	0.2	7.78731e-12	1.44268e-07
SNORD3A	-0.322819	0.16	0.289	1.92789e-10	3.57161e-06
RALGPS2	-0.284094	0.754	0.813	4.15999e-10	7.7068e-06
MYH9	-0.277357	0.619	0.698	8.42299e-10	1.56044e-05
KIAA1551	-0.302304	0.482	0.604	9.35505e-10	1.73312e-05
NCOA3	-0.289688	0.527	0.641	1.12369e-09	2.08174e-05
SMCHD1	-0.255677	0.645	0.747	1.31072e-09	2.42823e-05
AL031733.2	-0.270734	0.451	0.568	3.0458e-09	5.64264e-05
ATF7IP	-0.307682	0.357	0.491	3.88176e-09	7.19135e-05
ENSG00000274428-RF00003	-0.258054	0.02	0.079	5.90497e-09	0.000109395
TMEM131L	-0.263944	0.306	0.421	5.22614e-08	0.000968195
TSC22D3	-0.260569	0.815	0.866	5.73081e-08	0.00106169
TAGAP	-0.282802	0.313	0.414	7.69987e-07	0.0142648
RPL13P12	-0.380917	0.375	0.5	8.5948e-07	0.0159227
NEAT1	-0.26244	0.343	0.447	3.23493e-06	0.0599303
PRPF8	-0.257857	0.418	0.491	1.24825e-05	0.231251
FLNA	-0.26627	0.404	0.469	6.4307e-05	1
AL365357.1	-0.336221	0.654	0.623	0.000445217	1
TCL1A	-0.483961	0.122	0.176	0.000979537	1
IGHV3-49	-0.430244	0.016	0.04	0.00402988	1
USM2 (up-regulated genes)
RPS26	1.62303	0.976	0.927	1.3872e-37	2.56993e-33
HLA-DRB5	0.523038	1	1	1.47024e-17	2.72377e-13
AC004057.1	0.702459	0.462	0.073	3.16694e-14	5.86707e-10
DUSP1	0.875336	0.752	0.495	6.51698e-12	1.20734e-07
IGKV6-21	2.56504	0.315	0.009	7.2083e-11	1.33541e-06
IGHV2-5	2.07689	0.331	0.018	8.31561e-11	1.54055e-06
MT-ATP8	0.413691	0.963	0.917	4.69916e-10	8.70567e-06
CD79A	0.363612	0.998	1	2.31299e-09	4.28504e-05
CD72	0.553908	0.765	0.45	3.24569e-09	6.01297e-05
AL928742.1	0.449688	0.725	0.413	7.60303e-09	0.000140854
HLA-DQA2	0.560063	0.77	0.734	9.83734e-09	0.000182247
HLA-DPB1	0.280372	0.997	0.972	2.52054e-08	0.000466956
RPL23A	0.263906	0.992	0.972	3.00239e-08	0.000556222
LAPTM5	0.379242	0.994	0.991	7.6025e-08	0.00140844
IGHG2	0.391352	0.826	0.578	2.75198e-07	0.00509831
RGS2	0.511606	0.259	0.046	1.28661e-06	0.0238357
AP001324.1	0.370254	0.775	0.569	1.6083e-06	0.0297953
LILRB2	0.602436	0.334	0.119	2.68462e-06	0.0497352
NPC2	0.367852	0.597	0.349	3.61097e-06	0.0668967
ZNF331	0.536063	0.34	0.128	4.15021e-06	0.0768868
FOS	0.509447	0.201	0.018	4.91097e-06	0.0909807
CD19	0.367798	0.843	0.697	1.26499e-05	0.234351
EEF1A1P5	0.319929	0.805	0.688	1.30985e-05	0.242663
IGHA1	0.429397	0.657	0.45	2.00795e-05	0.371993
IGHG3	0.444299	0.666	0.45	4.32196e-05	0.800687
NR4A1	0.389964	0.165	0.018	6.97e-05	1
LILRA4	0.330643	0.372	0.165	8.73512e-05	1
MT-ND1	0.304033	0.992	1	0.000164985	1
TUBA1B	0.2885	0.772	0.615	0.000211294	1
CD84	0.288372	0.34	0.174	0.000376594	1
GALNTL6	0.284392	0.121	0.009	0.000454456	1
FAM46A	0.309267	0.335	0.174	0.000462166	1
FGD4	0.350081	0.224	0.083	0.000536628	1
ATP5MC3	0.26036	0.751	0.615	0.000567233	1
JUN	0.418788	0.722	0.624	0.00081013	1
RHOB	0.415113	0.46	0.294	0.000911116	1
PPP1R15A	0.264846	0.556	0.358	0.000935449	1
CYTH4	0.324776	0.558	0.422	0.000956413	1
MACROD2	0.445455	0.388	0.257	0.00204043	1
EPB41L2	0.311388	0.166	0.055	0.00225083	1
WNT16	0.30388	0.45	0.312	0.00247647	1
CIB1	0.261853	0.879	0.798	0.0026245	1
ADGRE5	0.271489	0.452	0.312	0.00336757	1
ST6GAL1	0.274138	0.698	0.578	0.00396189	1
PHACTR1	0.265531	0.23	0.119	0.00514147	1
SLC2A3	0.3218	0.398	0.294	0.00719404	1
STMN1	0.250152	0.23	0.128	0.00812191	1
SKAP2	0.252214	0.46	0.349	0.00827031	1
IGKV1-6	0.30893	0.011	0.046	0.00879469	1
HSPA4	0.260969	0.404	0.284	0.0092049	1
POLH	0.320536	0.283	0.174	0.00961283	1
USM2 (down-regulated genes)
ACTB	-0.427053	0.974	1	6.69198e-12	1.23976e-07
RPL13P12	-0.863818	0.299	0.596	3.30507e-11	6.12297e-07
SMDT1	-0.447651	0.543	0.798	2.05122e-10	3.8001e-06
JAK1	-0.441031	0.479	0.734	3.11238e-10	5.766e-06
SYNGR2	-0.380864	0.617	0.917	6.48982e-10	1.2023e-05
TAGLN2	-0.519592	0.725	0.872	9.28597e-10	1.72032e-05
CD99	-0.405748	0.526	0.78	1.41656e-09	2.62432e-05
LTB	-0.447944	0.653	0.917	7.06674e-09	0.000130918
SELL	-0.616447	0.38	0.606	8.33335e-09	0.000154384
RALGPS2	-0.474161	0.692	0.844	1.20116e-08	0.000222527
ISCU	-0.37989	0.524	0.807	1.27898e-08	0.000236944
MT-ND4	-0.266399	0.994	1	1.42919e-08	0.000264771
S100A10	-0.648782	0.361	0.587	5.83942e-08	0.00108181
PCBP2	-0.342303	0.655	0.945	1.11772e-07	0.00207068
FAM30A	-0.34739	0.278	0.541	1.40161e-07	0.00259663
CALM1	-0.312133	0.743	0.927	1.79455e-07	0.00332458
DCK	-0.376069	0.296	0.541	2.51732e-07	0.00466359
CAPG	-0.476803	0.34	0.55	2.95075e-07	0.00546656
GPX1	-0.379027	0.447	0.706	5.39993e-07	0.0100039
ATP2B1	-0.381437	0.372	0.578	6.86446e-07	0.0127171
HMGN1	-0.324062	0.597	0.826	7.05411e-07	0.0130684
GPX4	-0.342935	0.495	0.725	9.19677e-07	0.0170379
ATP5F1D	-0.305811	0.516	0.761	1.24881e-06	0.0231355
COTL1	-0.407651	0.642	0.817	1.61738e-06	0.0299637
RCSD1	-0.39153	0.583	0.734	1.72903e-06	0.032032
TAGAP	-0.429825	0.248	0.44	2.48693e-06	0.0460728
ARPC2	-0.289432	0.728	0.954	2.60998e-06	0.0483525
CYB5R3	-0.326752	0.38	0.596	2.81159e-06	0.0520875
UVRAG	-0.32454	0.238	0.45	2.86068e-06	0.0529969
CAST	-0.390632	0.438	0.633	3.12387e-06	0.0578728
GTF3A	-0.299337	0.473	0.688	3.47592e-06	0.0643949
GABARAPL2	-0.303658	0.589	0.752	3.61223e-06	0.0669202
EIF3F	-0.250394	0.679	0.908	3.89558e-06	0.0721695
AL031733.2	-0.420789	0.299	0.486	3.90982e-06	0.0724334
HERPUD1	-0.376679	0.482	0.706	3.99532e-06	0.0740172
CD47	-0.36173	0.498	0.679	6.00871e-06	0.111317
SMC6	-0.350498	0.457	0.661	6.61537e-06	0.122556
SUMO3	-0.363645	0.284	0.468	9.54436e-06	0.176819
ANXA11	-0.313083	0.463	0.661	9.84777e-06	0.18244
PPDPF	-0.261991	0.545	0.789	1.17807e-05	0.21825
SMCHD1	-0.394726	0.542	0.697	1.3249e-05	0.24545
CHCHD10	-0.274661	0.474	0.716	1.4369e-05	0.2662
TCEA1	-0.275451	0.481	0.697	1.50532e-05	0.278875
ZNF706	-0.293444	0.46	0.67	1.5212e-05	0.281818
CD55	-0.378174	0.327	0.505	1.52344e-05	0.282232
RPS15A	-0.279314	0.765	0.881	1.55808e-05	0.288649
CD44	-0.378445	0.379	0.541	1.60652e-05	0.297623
PDLIM2	-0.262158	0.249	0.45	1.90473e-05	0.352869
MYADM	-0.337866	0.134	0.284	2.22236e-05	0.411714
VPREB3	-0.40828	0.166	0.33	2.35046e-05	0.435447
EFR3A	-0.274598	0.153	0.321	2.63903e-05	0.488907
TMEM131L	-0.317823	0.196	0.367	2.66731e-05	0.494146
AHNAK	-0.488936	0.62	0.743	3.14503e-05	0.582648
TSPO	-0.315718	0.225	0.385	3.43435e-05	0.636248
NCOR1	-0.307958	0.494	0.642	4.39506e-05	0.814228
STOML2	-0.255185	0.177	0.33	5.61471e-05	1
PTPN1	-0.292478	0.468	0.633	6.20876e-05	1
KIAA1551	-0.347845	0.422	0.596	6.26339e-05	1
CLIC4	-0.334611	0.173	0.321	6.64215e-05	1
PAK2	-0.40165	0.371	0.532	6.88233e-05	1
TMEM160	-0.28777	0.256	0.422	6.9098e-05	1
RUBCNL	-0.3173	0.372	0.541	7.91365e-05	1
ANP32B	-0.266511	0.562	0.752	7.93529e-05	1
PDCD5	-0.266802	0.275	0.45	8.40137e-05	1
MRPS26	-0.281534	0.227	0.394	8.50798e-05	1
WASF2	-0.258046	0.449	0.624	9.05697e-05	1
LINC00926	-0.296182	0.663	0.789	9.20492e-05	1
LRRFIP1	-0.342313	0.516	0.642	9.3327e-05	1
TCP11L2	-0.269969	0.096	0.22	9.6155e-05	1
AES	-0.31764	0.551	0.697	9.71088e-05	1
C1QBP	-0.252355	0.406	0.578	0.000109783	1
UBXN1	-0.292025	0.69	0.853	0.000111541	1
NAXE	-0.267925	0.2	0.358	0.000113207	1
ENSG00000273727-RF00003	-0.322748	0.03	0.11	0.000122064	1
CSGALNACT1	-0.355772	0.302	0.45	0.000129606	1
PRELID1	-0.284177	0.401	0.578	0.000151944	1
RANBP1	-0.258612	0.222	0.385	0.000161911	1
IGLC2	-0.456176	0.286	0.459	0.00016975	1
IGKV1-9	-0.968516	0.022	0.092	0.000175125	1
CPNE5	-0.293144	0.356	0.523	0.000186146	1
ADAM19	-0.305019	0.193	0.339	0.000200923	1
DEGS1	-0.276769	0.224	0.367	0.000206118	1
NOL7	-0.274061	0.339	0.514	0.000212328	1
DPP7	-0.29047	0.361	0.55	0.000224368	1
STAT3	-0.257002	0.327	0.514	0.000231186	1
IFNGR2	-0.294256	0.444	0.615	0.000233584	1
TTC17	-0.316465	0.228	0.376	0.000235267	1
GPX1P1	-0.294136	0.404	0.587	0.000236864	1
CDC42SE2	-0.289118	0.345	0.505	0.000258056	1
CCDC141	-0.272724	0.083	0.193	0.000268782	1
ALOX5	-0.316238	0.363	0.532	0.000297131	1
CRIP2	-0.335203	0.174	0.321	0.000299358	1
PDLIM1	-0.252501	0.511	0.697	0.000306165	1
IGLC3	-0.383466	0.227	0.385	0.000323324	1
GUK1	-0.25632	0.404	0.569	0.000324993	1
ZNF860	-0.267658	0.187	0.33	0.000359151	1
INPP5K	-0.268363	0.115	0.229	0.000390293	1
ENSG00000275291-RF00003	-0.357442	0.061	0.156	0.000390787	1
FLNA	-0.372552	0.463	0.606	0.000413616	1
TTC3	-0.265523	0.375	0.523	0.000420876	1
LSM2	-0.272364	0.343	0.505	0.000427727	1
SRPK2	-0.276128	0.414	0.578	0.000454491	1
ITGA4	-0.371299	0.498	0.624	0.000469019	1
COBLL1	-0.324663	0.22	0.367	0.000493797	1
MRPS5	-0.303835	0.204	0.33	0.000522366	1
KRT10	-0.269987	0.388	0.55	0.000529738	1
PLPP5	-0.323839	0.19	0.321	0.000552507	1
GMCL1	-0.25481	0.126	0.239	0.00055577	1
SP140	-0.323366	0.529	0.642	0.000563771	1
RAB31	-0.260213	0.182	0.312	0.000565692	1
PHF11	-0.274008	0.272	0.413	0.000574783	1
TRABD	-0.264549	0.16	0.284	0.000613648	1
LPGAT1	-0.268033	0.153	0.275	0.000624562	1
HIGD2A	-0.282957	0.371	0.505	0.00071032	1
TSPAN3	-0.257067	0.551	0.725	0.00082535	1
PIK3CD	-0.271628	0.272	0.413	0.000852134	1
IGLV1-51	-1.21028	0.043	0.119	0.000938971	1
NDUFB10	-0.261729	0.39	0.55	0.000950067	1
SF1	-0.2591	0.703	0.771	0.00101404	1
PNPLA2	-0.270709	0.347	0.495	0.00105351	1
COX5A	-0.282777	0.419	0.569	0.00118717	1
SCAF4	-0.290316	0.249	0.367	0.00121839	1
ARPC5L	-0.251172	0.334	0.477	0.00123557	1
PRKDC	-0.282469	0.241	0.376	0.0014161	1
SNX22	-0.287603	0.217	0.339	0.00164517	1
SLTM	-0.262777	0.369	0.495	0.00176997	1
NCOA3	-0.34485	0.529	0.633	0.00180223	1
IGKV1-17	-0.959923	0.016	0.064	0.0018956	1
NAP1L1	-0.254458	0.588	0.688	0.00195086	1
MTDH	-0.268693	0.532	0.661	0.00201532	1
PARP15	-0.252651	0.444	0.56	0.00224157	1
IGLV2-14	-0.639536	0.058	0.138	0.00250057	1
SMARCC1	-0.291775	0.211	0.33	0.00271306	1
SP100	-0.2551	0.665	0.743	0.00310974	1
LRPPRC	-0.275394	0.187	0.294	0.00371018	1
JCHAIN	-0.483712	0.193	0.312	0.00400108	1
NCR3	-0.28053	0.224	0.339	0.00427884	1
PARP14	-0.277417	0.235	0.358	0.00432597	1
IGKV4-1	-0.75785	0.081	0.165	0.00483153	1
S100A4	-0.332719	0.387	0.514	0.00498232	1
BACH2	-0.290276	0.176	0.284	0.00500421	1
MIS18BP1	-0.274966	0.315	0.44	0.00554188	1
MARCKS	-0.300473	0.163	0.266	0.00620506	1
PPP1R16B	-0.322073	0.184	0.275	0.00647537	1
CXXC5	-0.264428	0.442	0.55	0.0068405	1
NFKBIA	-0.26109	0.364	0.486	0.0090911	1
UBTF	-0.25187	0.235	0.339	0.00916148	1
SM1 (up-regulated genes)
RPS26	2.02177	0.981	0.889	4.14325e-128	7.67578e-124
AC004057.1	0.71047	0.46	0.075	1.10201e-41	2.04159e-37
AP001324.1	0.392695	0.817	0.629	3.798e-22	7.03617e-18
AC025750.2	0.401058	0.166	0	1.055e-17	1.95449e-13
AL928742.1	0.317969	0.474	0.255	1.13149e-12	2.09621e-08
HLA-DRB5	0.268277	0.993	0.99	3.20923e-12	5.94541e-08
HIST1H2AC	0.282132	0.211	0.08	3.38848e-09	6.2775e-05
KDM4B	0.268759	0.375	0.219	1.36512e-08	0.000252901
CD69	0.258736	0.245	0.111	3.14004e-08	0.000581724
JUNB	0.410587	0.734	0.657	8.3603e-08	0.00154883
IGHA1	0.343202	0.622	0.526	2.70734e-07	0.00501561
IGHM	0.337085	0.393	0.245	5.04844e-07	0.00935273
HLA-DQA2	0.423074	0.611	0.683	1.97966e-06	0.0366751
DUSP1	0.3487	0.459	0.356	2.78806e-05	0.516515
JUN	0.253904	0.51	0.436	0.000553025	1
SM1 (down-regulated genes)
RPS4Y1	-0.572523	0.209	0.515	1.81664e-28	3.36551e-24
AHNAK	-0.53557	0.615	0.773	1.9104e-21	3.53921e-17
ENSG00000275291-RF00003	-0.487744	0.096	0.268	1.53523e-18	2.84417e-14
RPL9P9	-0.366594	0.215	0.418	1.93926e-17	3.59266e-13
RPL13P12	-0.878621	0.347	0.515	3.40962e-14	6.31666e-10
RPS15A	-0.268634	0.879	0.928	5.54468e-14	1.02721e-09
MT-RNR1	-0.335711	1	1	2.64928e-12	4.90806e-08
CNTNAP2	-0.273741	0.099	0.224	2.68403e-11	4.97243e-07
TSC22D3	-0.253683	0.802	0.902	1.01112e-10	1.87321e-06
ENSG00000273727-RF00003	-0.328685	0.038	0.124	1.37792e-10	2.55274e-06
ATRX	-0.250036	0.466	0.598	4.96683e-09	9.20155e-05
SMCHD1	-0.276785	0.52	0.639	1.29037e-08	0.000239054
MYH9	-0.277215	0.562	0.662	1.4923e-08	0.000276464
CRYBG1	-0.275074	0.244	0.361	1.28174e-07	0.00237456
MAP4	-0.282335	0.215	0.32	1.29033e-06	0.0239047
ITGB1	-0.469152	0.395	0.479	3.1379e-06	0.0581328
ATP2B1	-0.268015	0.405	0.482	3.7468e-05	0.694131
KLF6	-0.25406	0.546	0.606	7.07498e-05	1
IGKV2-30	-0.632624	0.044	0.077	0.00909273	1
SM2 (up-regulated genes)
RPS26	1.56397	0.992	0.973	2.07471e-84	3.84361e-80
AC004057.1	0.621674	0.459	0.117	1.02167e-29	1.89274e-25
RPL23A	0.31968	0.995	0.976	9.41862e-28	1.74489e-23
AC025750.2	0.302848	0.155	0	3.49316e-14	6.47142e-10
MT-ATP8	0.2542	0.974	0.916	2.83692e-13	5.25568e-09
AP001324.1	0.341931	0.768	0.592	3.6113e-13	6.69029e-09
NFKBIA	0.369638	0.67	0.517	1.73206e-10	3.20881e-06
JUN	0.471094	0.561	0.384	5.20188e-10	9.63701e-06
CD24	0.351767	0.587	0.435	4.2295e-08	0.000783557
JUNB	0.442596	0.791	0.685	4.51473e-08	0.0008364
DUSP1	0.43694	0.501	0.351	5.20795e-08	0.000964824
CD69	0.258531	0.299	0.183	2.25722e-05	0.418173
AL928742.1	0.262903	0.318	0.201	5.31018e-05	0.983764
RHOB	0.253301	0.175	0.087	0.000178703	1
DUSP2	0.495609	0.132	0.066	0.00088853	1
EGR1	0.383622	0.132	0.072	0.00351677	1
FOS	0.318933	0.087	0.039	0.00441918	1
IGLC2	0.261324	0.321	0.225	0.00489914	1
SM2 (down-regulated genes)
RPS4Y1	-0.680599	0.261	0.619	4.59478e-29	8.5123e-25
AHNAK	-0.474014	0.859	0.916	1.91771e-15	3.55276e-11
RPL13P12	-0.723974	0.364	0.586	1.97706e-14	3.6627e-10
JAK1	-0.299899	0.668	0.838	1.74264e-13	3.22841e-09
MYH9	-0.340609	0.715	0.808	2.23914e-10	4.14823e-06
RPL9P9	-0.274163	0.251	0.432	1.06363e-09	1.97048e-05
NCOA3	-0.362232	0.447	0.577	1.08135e-08	0.000200332
ENSG00000275291-RF00003	-0.288336	0.091	0.21	6.03904e-08	0.00111879
MT-RNR1	-0.356783	1	1	6.07414e-08	0.0011253
RALGPS2	-0.254438	0.565	0.703	3.37673e-07	0.00625573
ITGB1	-0.303736	0.667	0.754	1.27079e-06	0.0235427
MEF2A	-0.310603	0.355	0.492	1.86772e-06	0.0346013
FLNA	-0.286423	0.573	0.664	2.44031e-06	0.0452092
SETX	-0.250999	0.299	0.432	3.53514e-06	0.0654919
MYADM	-0.296178	0.158	0.267	9.57069e-06	0.177307
ITGA4	-0.265263	0.606	0.682	1.79643e-05	0.332808
IQGAP1	-0.261715	0.516	0.619	2.64077e-05	0.489229
PRPF8	-0.276399	0.418	0.502	0.000550179	1
IGLV2-18	-0.3276	0.001	0.021	0.000563651	1
IGKV3-15	-0.506426	0.056	0.108	0.00234257	1
IGKV1-27	-0.371186	0.019	0.051	0.00405289	1
PC (up-regulated genes)
NDE1	0.299044	0.373	0	0.00106196	1
RPL23A	0.478563	1	1	0.00152702	1
SNHG8	0.337436	0.712	0.273	0.00254091	1
SNX2	0.633905	0.695	0.273	0.00273877	1
AP000769.1	0.265008	0.322	0	0.00287429	1
RPS4X	0.255802	1	1	0.0033258	1
SMIM14	0.387381	0.288	0	0.00540672	1
CD37	1.21511	0.983	0.727	0.0062376	1
CYB5A	0.272294	0.339	0.045	0.00720127	1
CIB1	0.364497	0.814	0.5	0.00781366	1
HMGB2	0.42107	0.508	0.182	0.00970081	1
PC (down-regulated genes)
FNDC3B	-0.397754	0.559	0.909	4.24597e-05	0.786608
EIF1AY	-0.2698	0.085	0.545	5.13125e-05	0.950616
KDM5D	-0.303463	0.034	0.364	7.86639e-05	1
STX12	-0.267635	0.203	0.591	8.90187e-05	1
PDXDC1	-0.411373	0.441	0.818	0.000120219	1
AHNAK	-0.569938	0.746	1	0.000205499	1
CDK17	-0.365407	0.424	0.727	0.000249823	1
MYO5A	-0.343244	0.153	0.5	0.00025794	1
MYH9	-0.459301	0.746	1	0.000430853	1
CANX	-0.598697	0.814	0.909	0.000437256	1
SMCHD1	-0.550144	0.797	1	0.000457769	1
GNAS	-0.365863	0.797	1	0.000515794	1
CDK2AP2	-0.321584	0.831	1	0.000541356	1
HLA-A	-0.49291	0.847	1	0.000564949	1
NCOA3	-0.472246	0.847	0.955	0.000671501	1
C4orf48	-0.324987	0.593	0.864	0.000843833	1
ALAD	-0.285327	0.169	0.5	0.000852624	1
MIA3	-0.298782	0.475	0.773	0.000887447	1
LUC7L	-0.263348	0.339	0.636	0.000899562	1
CLINT1	-0.42882	0.797	0.909	0.000912949	1
SYNE2	-0.275313	0.254	0.591	0.000975485	1
C12orf75	-0.309054	0.542	0.955	0.000978541	1
ILF3	-0.33926	0.542	0.955	0.001017	1
C12orf65	-0.304021	0.203	0.545	0.00108004	1
TMEM19	-0.260212	0.305	0.636	0.0012874	1
MAPK1IP1L	-0.330866	0.695	0.909	0.00135406	1
ATRX	-0.315153	0.78	1	0.00138714	1
STT3A	-0.373859	0.831	0.909	0.00144621	1
CEP250	-0.254383	0.203	0.545	0.00148949	1
UPF3A	-0.395934	0.627	0.818	0.00152867	1
TP53INP1	-0.271287	0.542	0.818	0.00161667	1
ARL5B	-0.2647	0.085	0.364	0.00164028	1
DNAJC3	-0.259058	0.695	0.909	0.00175177	1
BDP1	-0.338067	0.39	0.682	0.00191576	1
CAPN2	-0.356496	0.746	0.909	0.00194264	1
TBC1D9	-0.281241	0.237	0.545	0.00197632	1
FBXW11	-0.257366	0.237	0.545	0.00206336	1
ERO1A	-0.310055	0.305	0.591	0.00212842	1
RANBP2	-0.35279	0.475	0.773	0.00215293	1
CHD4	-0.338807	0.153	0.455	0.0021647	1
SRRM2	-0.361655	0.712	0.909	0.00227954	1
RAP1A	-0.304775	0.661	0.909	0.00235961	1
FAM46C	-0.387795	0.831	1	0.00249733	1
KDELR2	-0.342946	0.746	0.955	0.00255692	1
PRKAR1A	-0.297268	0.339	0.636	0.0028011	1
SUCLA2	-0.251854	0.305	0.591	0.00281993	1
ANKRD36BP2	-0.482795	0.458	0.773	0.00282539	1
STK38L	-0.304977	0.39	0.636	0.00295835	1
PEBP1	-0.485455	0.847	1	0.00298024	1
ITGA4	-0.664368	0.847	0.864	0.00300484	1
PDIA5	-0.257347	0.407	0.682	0.00314773	1
HERC2	-0.327707	0.441	0.636	0.00326013	1
C4orf3	-0.333305	0.847	1	0.00353822	1
BTAF1	-0.29342	0.39	0.636	0.00356717	1
FUT8	-0.436585	0.559	0.727	0.00361229	1
ALG2	-0.312159	0.576	0.773	0.00361616	1
COG3	-0.259267	0.373	0.636	0.00403559	1
SON	-0.33653	0.915	1	0.00407216	1
FLOT1	-0.252212	0.661	0.818	0.00414124	1
SP140	-0.328849	0.695	1	0.00414798	1
HACD4	-0.287283	0.203	0.455	0.00432588	1
TUFM	-0.321346	0.797	0.955	0.00442452	1
C19orf24	-0.285011	0.61	0.864	0.00451349	1
NSD3	-0.35038	0.661	0.864	0.00464903	1
ZFAND5	-0.257804	0.407	0.773	0.00465006	1
ZC3HAV1	-0.313128	0.373	0.636	0.00467364	1
NSD1	-0.267535	0.39	0.682	0.00470368	1
CAPRIN1	-0.402112	0.525	0.818	0.00476533	1
CALR	-0.388694	0.932	1	0.00514162	1
BIRC6	-0.263481	0.458	0.727	0.00515019	1
PAK2	-0.333508	0.525	0.727	0.00515754	1
PRDM1	-0.347712	0.746	0.955	0.00522731	1
ISOC2	-0.302962	0.678	0.864	0.00529155	1
SEC14L1	-0.314079	0.746	0.864	0.00532628	1
PRRC1	-0.252792	0.322	0.636	0.00533624	1
CLIC4	-0.254312	0.559	0.773	0.00541396	1
HSP90B1	-0.614711	0.898	1	0.0054833	1
CFLAR	-0.386724	0.864	0.955	0.00564208	1
CSF2RB	-0.256185	0.322	0.636	0.00574239	1
MOB1A	-0.335855	0.559	0.727	0.00583849	1
SEC61B	-0.333043	0.915	1	0.00624814	1
RPS15A	-0.299139	0.966	1	0.00688577	1
IBTK	-0.278038	0.576	0.727	0.00778861	1
GART	-0.271047	0.288	0.545	0.00791303	1
DDX17	-0.371685	0.763	0.864	0.00828648	1
SELENOS	-0.400484	0.78	0.955	0.00855278	1
RNU5F-1	-0.290036	0.169	0.409	0.00888871	1
VCP	-0.319	0.864	0.909	0.00907615	1
FH	-0.282144	0.407	0.682	0.00937354	1
CRIP1	-0.335426	0.407	0.636	0.00942121	1
ELF1	-0.265306	0.661	0.864	0.00978484	1

## Sheet: GO annotation
ID	Description	GeneRatio	BgRatio	pvalue	p.adjust	qvalue	geneID	Count
USM1 up-regulated gene (PD vs HC)
GO:0090150	establishment of protein localization to membrane	4/5	342/18866	5.23091e-07	8.78792e-05	3.35879e-05	RPS26/RPL23A/NCF1/CD24	4
GO:0006612	protein targeting to membrane	3/5	210/18866	1.33746e-05	0.00112347	0.000429396	RPS26/RPL23A/NCF1	3
GO:0045730	respiratory burst	2/5	37/18866	3.72868e-05	0.00208806	0.000798069	NCF1/CD24	2
GO:0061098	positive regulation of protein tyrosine kinase activity	2/5	60/18866	9.88539e-05	0.00415186	0.00158687	NCF1/CD24	2
GO:0006605	protein targeting	3/5	444/18866	0.000124992	0.00419973	0.00160516	RPS26/RPL23A/NCF1	3
GO:0061097	regulation of protein tyrosine kinase activity	2/5	93/18866	0.000238089	0.00646071	0.00246932	NCF1/CD24	2
GO:0006614	SRP-dependent cotranslational protein targeting to membrane	2/5	105/18866	0.000303485	0.00646071	0.00246932	RPS26/RPL23A	2
GO:0006613	cotranslational protein targeting to membrane	2/5	109/18866	0.000327024	0.00646071	0.00246932	RPS26/RPL23A	2
GO:0000184	nuclear-transcribed mRNA catabolic process, nonsense-mediated decay	2/5	120/18866	0.000396232	0.00646071	0.00246932	RPS26/RPL23A	2
GO:0045047	protein targeting to ER	2/5	120/18866	0.000396232	0.00646071	0.00246932	RPS26/RPL23A	2
GO:0072599	establishment of protein localization to endoplasmic reticulum	2/5	124/18866	0.000423022	0.00646071	0.00246932	RPS26/RPL23A	2
GO:0070972	protein localization to endoplasmic reticulum	2/5	152/18866	0.000634692	0.00888569	0.00339616	RPS26/RPL23A	2
GO:0002478	antigen processing and presentation of exogenous peptide antigen	2/5	177/18866	0.000859157	0.00920758	0.00351919	NCF1/HLA-DQA2	2
GO:0019083	viral transcription	2/5	178/18866	0.000868827	0.00920758	0.00351919	RPS26/RPL23A	2
GO:0019884	antigen processing and presentation of exogenous antigen	2/5	185/18866	0.000938007	0.00920758	0.00351919	NCF1/HLA-DQA2	2
GO:0006413	translational initiation	2/5	192/18866	0.00100978	0.00920758	0.00351919	RPS26/RPL23A	2
GO:0048002	antigen processing and presentation of peptide antigen	2/5	194/18866	0.00103076	0.00920758	0.00351919	NCF1/HLA-DQA2	2
GO:0019080	viral gene expression	2/5	195/18866	0.00104133	0.00920758	0.00351919	RPS26/RPL23A	2
GO:0050731	positive regulation of peptidyl-tyrosine phosphorylation	2/5	195/18866	0.00104133	0.00920758	0.00351919	NCF1/CD24	2
GO:0000956	nuclear-transcribed mRNA catabolic process	2/5	210/18866	0.00120622	0.0101322	0.00387259	RPS26/RPL23A	2
GO:0019882	antigen processing and presentation	2/5	232/18866	0.0014694	0.0117552	0.0044929	NCF1/HLA-DQA2	2
GO:0050730	regulation of peptidyl-tyrosine phosphorylation	2/5	263/18866	0.00188304	0.0143796	0.00549597	NCF1/CD24	2
GO:0045741	positive regulation of epidermal growth factor-activated receptor activity	1/5	13/18866	0.00344097	0.0238114	0.00910084	NCF1	1
GO:0072182	regulation of nephron tubule epithelial cell differentiation	1/5	13/18866	0.00344097	0.0238114	0.00910084	CD24	1
GO:0018108	peptidyl-tyrosine phosphorylation	2/5	374/18866	0.0037673	0.0238114	0.00910084	NCF1/CD24	2
GO:0006402	mRNA catabolic process	2/5	376/18866	0.00380693	0.0238114	0.00910084	RPS26/RPL23A	2
GO:0018212	peptidyl-tyrosine modification	2/5	377/18866	0.00382683	0.0238114	0.00910084	NCF1/CD24	2
GO:0072160	nephron tubule epithelial cell differentiation	1/5	15/18866	0.00396951	0.0238171	0.00910301	CD24	1
GO:0006401	RNA catabolic process	2/5	415/18866	0.00461945	0.026386	0.0100849	RPS26/RPL23A	2
GO:0061318	renal filtration cell differentiation	1/5	19/18866	0.00502591	0.026386	0.0100849	CD24	1
GO:0072112	glomerular visceral epithelial cell differentiation	1/5	19/18866	0.00502591	0.026386	0.0100849	CD24	1
GO:2000696	regulation of epithelial cell differentiation involved in kidney development	1/5	19/18866	0.00502591	0.026386	0.0100849	CD24	1
GO:0072311	glomerular epithelial cell differentiation	1/5	20/18866	0.00528987	0.0269303	0.0102929	CD24	1
GO:0072010	glomerular epithelium development	1/5	23/18866	0.00608142	0.0300494	0.011485	CD24	1
GO:0033119	negative regulation of RNA splicing	1/5	26/18866	0.00687246	0.0320715	0.0122579	RPS26	1
GO:0042104	positive regulation of activated T cell proliferation	1/5	26/18866	0.00687246	0.0320715	0.0122579	CD24	1
GO:0000027	ribosomal large subunit assembly	1/5	30/18866	0.0079264	0.035043	0.0133936	RPL23A	1
GO:0007176	regulation of epidermal growth factor-activated receptor activity	1/5	30/18866	0.0079264	0.035043	0.0133936	NCF1	1
GO:1900745	positive regulation of p38MAPK cascade	1/5	31/18866	0.00818975	0.0352789	0.0134838	NCF1	1
GO:0042554	superoxide anion generation	1/5	36/18866	0.00950563	0.0366371	0.0140029	NCF1	1
GO:0045742	positive regulation of epidermal growth factor receptor signaling pathway	1/5	36/18866	0.00950563	0.0366371	0.0140029	NCF1	1
GO:0071634	regulation of transforming growth factor beta production	1/5	36/18866	0.00950563	0.0366371	0.0140029	CD24	1
GO:2000273	positive regulation of signaling receptor activity	1/5	37/18866	0.00976864	0.0366371	0.0140029	NCF1	1
GO:0071276	cellular response to cadmium ion	1/5	38/18866	0.0100316	0.0366371	0.0140029	NCF1	1
GO:0071604	transforming growth factor beta production	1/5	38/18866	0.0100316	0.0366371	0.0140029	CD24	1
GO:1901186	positive regulation of ERBB signaling pathway	1/5	38/18866	0.0100316	0.0366371	0.0140029	NCF1	1
GO:0090184	positive regulation of kidney development	1/5	40/18866	0.0105573	0.0377369	0.0144232	CD24	1
GO:0046006	regulation of activated T cell proliferation	1/5	42/18866	0.0110829	0.03879	0.0148257	CD24	1
GO:0050798	activated T cell proliferation	1/5	46/18866	0.0121332	0.0407676	0.0155816	CD24	1
GO:1900744	regulation of p38MAPK cascade	1/5	46/18866	0.0121332	0.0407676	0.0155816	NCF1	1
GO:0035850	epithelial cell differentiation involved in kidney development	1/5	47/18866	0.0123957	0.0408328	0.0156065	CD24	1
GO:0038066	p38MAPK cascade	1/5	52/18866	0.0137071	0.0442844	0.0169258	NCF1	1
GO:0006968	cellular defense response	1/5	54/18866	0.0142313	0.0450145	0.0172048	NCF1	1
GO:0031295	T cell costimulation	1/5	56/18866	0.0147552	0.0450145	0.0172048	CD24	1
GO:0090183	regulation of kidney development	1/5	56/18866	0.0147552	0.0450145	0.0172048	CD24	1
GO:0061005	cell differentiation involved in kidney development	1/5	57/18866	0.0150171	0.0450145	0.0172048	CD24	1
GO:0031294	lymphocyte costimulation	1/5	58/18866	0.015279	0.0450145	0.0172048	CD24	1
GO:0045454	cell redox homeostasis	1/5	59/18866	0.0155407	0.0450145	0.0172048	NCF1	1
GO:0032835	glomerulus development	1/5	64/18866	0.0168488	0.0471767	0.0180312	CD24	1
GO:0046686	response to cadmium ion	1/5	64/18866	0.0168488	0.0471767	0.0180312	NCF1	1
GO:0042255	ribosome assembly	1/5	67/18866	0.017633	0.048563	0.018561	RPL23A	1
USM1 down-regulated gene (PD vs HC)
GO:0000244	spliceosomal tri-snRNP complex assembly	3/18	27/18866	2.10271e-06	0.00103874	0.000761401	RNU5A-1/RNU5F-1/PRPF8	3
GO:0000387	spliceosomal snRNP assembly	3/18	54/18866	1.7546e-05	0.00433386	0.00317675	RNU5A-1/RNU5F-1/PRPF8	3
GO:0000353	formation of quadruple SL/U4/U5/U6 snRNP	2/18	12/18866	5.64251e-05	0.0055748	0.00408637	RNU5A-1/RNU5F-1	2
GO:0000365	mRNA trans splicing, via spliceosome	2/18	12/18866	5.64251e-05	0.0055748	0.00408637	RNU5A-1/RNU5F-1	2
GO:0045291	mRNA trans splicing, SL addition	2/18	12/18866	5.64251e-05	0.0055748	0.00408637	RNU5A-1/RNU5F-1	2
USM2 up-regulated gene (PD vs HC)
GO:0050851	antigen receptor-mediated signaling pathway	9/45	325/18866	6.14486e-08	6.73476e-05	5.54978e-05	HLA-DRB5/IGHV2-5/CD79A/HLA-DQA2/HLA-DPB1/IGHG2/CD19/IGHA1/IGHG3	9
GO:0050853	B cell receptor signaling pathway	6/45	135/18866	7.77671e-07	0.000426164	0.00035118	IGHV2-5/CD79A/IGHG2/CD19/IGHA1/IGHG3	6
GO:0002429	immune response-activating cell surface receptor signaling pathway	9/45	481/18866	1.6551e-06	0.000453498	0.000373704	HLA-DRB5/IGHV2-5/CD79A/HLA-DQA2/HLA-DPB1/IGHG2/CD19/IGHA1/IGHG3	9
GO:0002757	immune response-activating signal transduction	9/45	481/18866	1.6551e-06	0.000453498	0.000373704	HLA-DRB5/IGHV2-5/CD79A/HLA-DQA2/HLA-DPB1/IGHG2/CD19/IGHA1/IGHG3	9
GO:0042113	B cell activation	7/45	328/18866	1.15879e-05	0.00254006	0.00209313	IGHV2-5/CD79A/IGHG2/CD19/IGHA1/IGHG3/SKAP2	7
GO:0038093	Fc receptor signaling pathway	6/45	241/18866	2.19178e-05	0.00400366	0.00329921	IGHV2-5/IGHG2/FOS/IGHG3/LILRA4/JUN	6
GO:0006910	phagocytosis, recognition	4/45	88/18866	5.68977e-05	0.00871376	0.00718057	IGHV2-5/IGHG2/IGHA1/IGHG3	4
GO:0006956	complement activation	5/45	178/18866	6.36041e-05	0.00871376	0.00718057	IGHV2-5/IGHG2/CD19/IGHA1/IGHG3	5
GO:0050864	regulation of B cell activation	5/45	195/18866	9.78764e-05	0.0119192	0.00982199	IGHV2-5/IGHG2/CD19/IGHA1/IGHG3	5
GO:0030449	regulation of complement activation	4/45	115/18866	0.000160963	0.0176415	0.0145375	IGHV2-5/IGHG2/CD19/IGHG3	4
GO:0051251	positive regulation of lymphocyte activation	6/45	357/18866	0.000192333	0.0178487	0.0147082	IGHV2-5/HLA-DPB1/IGHG2/LILRB2/IGHA1/IGHG3	6
GO:0016064	immunoglobulin mediated immune response	5/45	227/18866	0.000199194	0.0178487	0.0147082	IGHV2-5/IGHG2/CD19/IGHA1/IGHG3	5
GO:0019724	B cell mediated immunity	5/45	230/18866	0.000211709	0.0178487	0.0147082	IGHV2-5/IGHG2/CD19/IGHA1/IGHG3	5
GO:0006911	phagocytosis, engulfment	4/45	126/18866	0.000228638	0.0178991	0.0147498	IGHV2-5/IGHG2/IGHA1/IGHG3	4
GO:0006959	humoral immune response	6/45	377/18866	0.000258004	0.0188515	0.0155346	IGHV2-5/IGHG2/CD19/IGHA1/IGHG3/ST6GAL1	6
GO:0002920	regulation of humoral immune response	4/45	134/18866	0.000289281	0.0191863	0.0158105	IGHV2-5/IGHG2/CD19/IGHG3	4
GO:0099024	plasma membrane invagination	4/45	135/18866	0.000297598	0.0191863	0.0158105	IGHV2-5/IGHG2/IGHA1/IGHG3	4
GO:0006958	complement activation, classical pathway	4/45	141/18866	0.000351148	0.0210072	0.017311	IGHV2-5/IGHG2/IGHA1/IGHG3	4
GO:0010324	membrane invagination	4/45	143/18866	0.000370438	0.0210072	0.017311	IGHV2-5/IGHG2/IGHA1/IGHG3	4
GO:0002696	positive regulation of leukocyte activation	6/45	406/18866	0.000383343	0.0210072	0.017311	IGHV2-5/HLA-DPB1/IGHG2/LILRB2/IGHA1/IGHG3	6
GO:0050871	positive regulation of B cell activation	4/45	151/18866	0.00045524	0.0231476	0.0190747	IGHV2-5/IGHG2/IGHA1/IGHG3	4
GO:0050867	positive regulation of cell activation	6/45	421/18866	0.000464641	0.0231476	0.0190747	IGHV2-5/HLA-DPB1/IGHG2/LILRB2/IGHA1/IGHG3	6
GO:0002455	humoral immune response mediated by circulating immunoglobulin	4/45	155/18866	0.00050246	0.0239433	0.0197305	IGHV2-5/IGHG2/IGHA1/IGHG3	4
GO:0038095	Fc-epsilon receptor signaling pathway	4/45	169/18866	0.000695353	0.0317545	0.0261672	IGHV2-5/FOS/LILRA4/JUN	4
GO:0035994	response to muscle stretch	2/45	18/18866	0.000830738	0.0364196	0.0300115	FOS/JUN	2
GO:0070262	peptidyl-serine dephosphorylation	2/45	20/18866	0.00102851	0.0433557	0.0357272	DUSP1/PPP1R15A	2
USM2 down-regulated gene (PD vs HC)
GO:0002433	immune response-regulating cell surface receptor signaling pathway involved in phagocytosis	10/131	139/18866	4.60002e-08	4.04818e-05	3.52511e-05	ACTB/ARPC2/CD47/WASF2/IGLC2/IGLC3/IGLV1-51/IGKV1-17/IGLV2-14/IGKV4-1	10
GO:0038096	Fc-gamma receptor signaling pathway involved in phagocytosis	10/131	139/18866	4.60002e-08	4.04818e-05	3.52511e-05	ACTB/ARPC2/CD47/WASF2/IGLC2/IGLC3/IGLV1-51/IGKV1-17/IGLV2-14/IGKV4-1	10
GO:0038094	Fc-gamma receptor signaling pathway	10/131	142/18866	5.63621e-08	4.04818e-05	3.52511e-05	ACTB/ARPC2/CD47/WASF2/IGLC2/IGLC3/IGLV1-51/IGKV1-17/IGLV2-14/IGKV4-1	10
GO:0002431	Fc receptor mediated stimulatory signaling pathway	10/131	145/18866	6.87297e-08	4.04818e-05	3.52511e-05	ACTB/ARPC2/CD47/WASF2/IGLC2/IGLC3/IGLV1-51/IGKV1-17/IGLV2-14/IGKV4-1	10
GO:0038093	Fc receptor signaling pathway	12/131	241/18866	1.19176e-07	5.61559e-05	4.89e-05	ACTB/CALM1/ARPC2/CD47/PAK2/WASF2/IGLC2/IGLC3/IGLV1-51/IGKV1-17/IGLV2-14/IGKV4-1	12
GO:0030449	regulation of complement activation	8/131	115/18866	1.38317e-06	0.000543123	0.000472946	CD55/C1QBP/IGLC2/IGLC3/IGLV1-51/IGKV1-17/IGLV2-14/IGKV4-1	8
GO:0007015	actin filament organization	14/131	434/18866	1.99497e-06	0.000671451	0.000584692	S100A10/CAPG/COTL1/ARPC2/CD47/MYADM/PAK2/WASF2/TTC17/PDLIM1/INPP5K/FLNA/ARPC5L/MARCKS	14
GO:0006909	phagocytosis	13/131	382/18866	2.63779e-06	0.000776828	0.000676453	ACTB/ARPC2/CD47/ANXA11/WASF2/IGLC2/CDC42SE2/IGLC3/RAB31/IGLV1-51/IGKV1-17/IGLV2-14/IGKV4-1	13
GO:0110053	regulation of actin filament organization	11/131	278/18866	3.87984e-06	0.00101566	0.000884421	S100A10/CAPG/COTL1/ARPC2/CD47/MYADM/PAK2/WASF2/INPP5K/FLNA/ARPC5L	11
GO:0002920	regulation of humoral immune response	8/131	134/18866	4.36462e-06	0.0010283	0.000895436	CD55/C1QBP/IGLC2/IGLC3/IGLV1-51/IGKV1-17/IGLV2-14/IGKV4-1	8
GO:1900026	positive regulation of substrate adhesion-dependent cell spreading	5/131	38/18866	6.24373e-06	0.00109819	0.000956288	S100A10/ARPC2/MYADM/C1QBP/FLNA	5
GO:0006958	complement activation, classical pathway	8/131	141/18866	6.36694e-06	0.00109819	0.000956288	CD55/C1QBP/IGLC2/IGLC3/IGLV1-51/IGKV1-17/IGLV2-14/IGKV4-1	8
GO:0002429	immune response-activating cell surface receptor signaling pathway	14/131	481/18866	6.52572e-06	0.00109819	0.000956288	ACTB/ARPC2/CD47/STOML2/PAK2/WASF2/IGLC2/IGLC3/PIK3CD/IGLV1-51/IGKV1-17/IGLV2-14/NCR3/IGKV4-1	14
GO:0002757	immune response-activating signal transduction	14/131	481/18866	6.52572e-06	0.00109819	0.000956288	ACTB/ARPC2/CD47/STOML2/PAK2/WASF2/IGLC2/IGLC3/PIK3CD/IGLV1-51/IGKV1-17/IGLV2-14/NCR3/IGKV4-1	14
GO:0045785	positive regulation of cell adhesion	13/131	428/18866	9.03295e-06	0.00141878	0.00123545	JAK1/S100A10/ARPC2/CD47/CD55/CD44/MYADM/PAK2/C1QBP/ADAM19/ALOX5/FLNA/ITGA4	13
GO:1902903	regulation of supramolecular fiber organization	12/131	373/18866	1.1477e-05	0.00168998	0.00147162	S100A10/CAPG/GPX1/COTL1/ARPC2/CD47/MYADM/PAK2/WASF2/INPP5K/FLNA/ARPC5L	12
GO:0002455	humoral immune response mediated by circulating immunoglobulin	8/131	155/18866	1.27555e-05	0.00176776	0.00153934	CD55/C1QBP/IGLC2/IGLC3/IGLV1-51/IGKV1-17/IGLV2-14/IGKV4-1	8
GO:0051017	actin filament bundle assembly	8/131	157/18866	1.40038e-05	0.00183294	0.00159611	S100A10/CD47/PAK2/WASF2/PDLIM1/INPP5K/FLNA/MARCKS	8
GO:0061572	actin filament bundle organization	8/131	161/18866	1.68109e-05	0.00208455	0.0018152	S100A10/CD47/PAK2/WASF2/PDLIM1/INPP5K/FLNA/MARCKS	8
GO:0038095	Fc-epsilon receptor signaling pathway	8/131	169/18866	2.38596e-05	0.00281067	0.0024475	CALM1/PAK2/IGLC2/IGLC3/IGLV1-51/IGKV1-17/IGLV2-14/IGKV4-1	8
GO:1900024	regulation of substrate adhesion-dependent cell spreading	5/131	53/18866	3.28421e-05	0.00368457	0.00320848	S100A10/ARPC2/MYADM/C1QBP/FLNA	5
GO:0006956	complement activation	8/131	178/18866	3.45996e-05	0.00370531	0.00322654	CD55/C1QBP/IGLC2/IGLC3/IGLV1-51/IGKV1-17/IGLV2-14/IGKV4-1	8
GO:0032956	regulation of actin cytoskeleton organization	11/131	360/18866	4.31735e-05	0.00442246	0.00385103	S100A10/CAPG/COTL1/ARPC2/CD47/MYADM/PAK2/WASF2/INPP5K/FLNA/ARPC5L	11
GO:0046034	ATP metabolic process	10/131	311/18866	6.37075e-05	0.00625395	0.00544587	ISCU/ATP5F1D/CHCHD10/TSPO/NCOR1/STOML2/STAT3/GUK1/NDUFB10/COX5A	10
GO:0032231	regulation of actin filament bundle assembly	6/131	104/18866	8.6894e-05	0.00812751	0.00707735	S100A10/CD47/PAK2/WASF2/INPP5K/FLNA	6
GO:0030038	contractile actin filament bundle assembly	6/131	106/18866	9.65919e-05	0.00812751	0.00707735	S100A10/CD47/PAK2/WASF2/PDLIM1/INPP5K	6
GO:0034446	substrate adhesion-dependent cell spreading	6/131	106/18866	9.65919e-05	0.00812751	0.00707735	S100A10/ARPC2/MYADM/C1QBP/FLNA/ITGA4	6
GO:0043149	stress fiber assembly	6/131	106/18866	9.65919e-05	0.00812751	0.00707735	S100A10/CD47/PAK2/WASF2/PDLIM1/INPP5K	6
GO:0045123	cellular extravasation	5/131	67/18866	0.00010227	0.00830856	0.00723501	CD99/SELL/CD47/ITGA4/PIK3CD	5
GO:0002697	regulation of immune effector process	12/131	470/18866	0.00010809	0.00848871	0.00739187	PCBP2/CD47/CD55/C1QBP/IGLC2/IGLC3/IGLV1-51/PRKDC/IGKV1-17/IGLV2-14/NCR3/IGKV4-1	12
GO:0032970	regulation of actin filament-based process	11/131	405/18866	0.00012333	0.00937308	0.00816198	S100A10/CAPG/COTL1/ARPC2/CD47/MYADM/PAK2/WASF2/INPP5K/FLNA/ARPC5L	11
GO:0019372	lipoxygenase pathway	3/131	16/18866	0.000171501	0.0126268	0.0109953	GPX1/GPX4/ALOX5	3
GO:0016064	immunoglobulin mediated immune response	8/131	227/18866	0.000188853	0.013483	0.0117408	CD55/C1QBP/IGLC2/IGLC3/IGLV1-51/IGKV1-17/IGLV2-14/IGKV4-1	8
GO:0019724	B cell mediated immunity	8/131	230/18866	0.000206508	0.0143098	0.0124608	CD55/C1QBP/IGLC2/IGLC3/IGLV1-51/IGKV1-17/IGLV2-14/IGKV4-1	8
GO:0002460	adaptive immune response based on somatic recombination of immune receptors built from immunoglobulin superfamily domains	10/131	370/18866	0.000262646	0.0176798	0.0153954	CD55/C1QBP/IGLC2/STAT3/IGLC3/IGLV1-51/IGKV1-17/IGLV2-14/IGKV4-1/BACH2	10
GO:0006959	humoral immune response	10/131	377/18866	0.000304822	0.0199489	0.0173713	CD55/C1QBP/IGLC2/ALOX5/IGLC3/IGLV1-51/IGKV1-17/IGLV2-14/JCHAIN/IGKV4-1	10
GO:0030041	actin filament polymerization	7/131	193/18866	0.000403333	0.0253995	0.0221176	CAPG/COTL1/ARPC2/MYADM/WASF2/TTC17/ARPC5L	7
GO:1903573	negative regulation of response to endoplasmic reticulum stress	4/131	51/18866	0.000430951	0.0253995	0.0221176	HERPUD1/PTPN1/UBXN1/ALOX5	4
GO:0051492	regulation of stress fiber assembly	5/131	91/18866	0.000431231	0.0253995	0.0221176	S100A10/CD47/PAK2/WASF2/INPP5K	5
GO:0060333	interferon-gamma-mediated signaling pathway	5/131	91/18866	0.000431231	0.0253995	0.0221176	JAK1/CD44/IFNGR2/SP100/PARP14	5
GO:0045185	maintenance of protein location	5/131	93/18866	0.00047663	0.0263134	0.0229134	CHCHD10/TSPO/FLNA/SP100/NFKBIA	5
GO:2000117	negative regulation of cysteine-type endopeptidase activity	5/131	93/18866	0.00047663	0.0263134	0.0229134	GPX1/CAST/HERPUD1/CD44/PAK2	5
GO:0006898	receptor-mediated endocytosis	9/131	328/18866	0.000480252	0.0263134	0.0229134	IGLC2/IGLC3/ITGA4/RAB31/IGLV1-51/IGKV1-17/IGLV2-14/JCHAIN/IGKV4-1	9
GO:0002831	regulation of response to biotic stimulus	10/131	409/18866	0.000576801	0.0308851	0.0268944	JAK1/PCBP2/CD55/PTPN1/PAK2/C1QBP/IFNGR2/PRKDC/NCR3/PARP14	10
GO:0006119	oxidative phosphorylation	6/131	149/18866	0.000609778	0.0319253	0.0278002	ISCU/ATP5F1D/CHCHD10/STOML2/NDUFB10/COX5A	6
GO:1902905	positive regulation of supramolecular fiber organization	7/131	208/18866	0.000630248	0.0322797	0.0281088	S100A10/GPX1/ARPC2/CD47/WASF2/FLNA/ARPC5L	7
GO:0002377	immunoglobulin production	7/131	210/18866	0.000666923	0.0323553	0.0281747	VPREB3/IGKV1-9/IGLV1-51/PRKDC/IGKV1-17/IGLV2-14/IGKV4-1	7
GO:0060330	regulation of response to interferon-gamma	3/131	25/18866	0.000672925	0.0323553	0.0281747	JAK1/IFNGR2/PARP14	3
GO:0060334	regulation of interferon-gamma-mediated signaling pathway	3/131	25/18866	0.000672925	0.0323553	0.0281747	JAK1/IFNGR2/PARP14	3
GO:0110020	regulation of actomyosin structure organization	5/131	102/18866	0.000726859	0.0336442	0.029297	S100A10/CD47/PAK2/WASF2/INPP5K	5
GO:0015980	energy derivation by oxidation of organic compounds	8/131	278/18866	0.000728889	0.0336442	0.029297	ISCU/CALM1/ATP5F1D/RUBCNL/PRELID1/INPP5K/NDUFB10/COX5A	8
GO:0022409	positive regulation of cell-cell adhesion	8/131	279/18866	0.0007461	0.0336442	0.029297	JAK1/CD47/CD55/CD44/PAK2/ADAM19/ALOX5/ITGA4	8
GO:0031579	membrane raft organization	3/131	26/18866	0.000756852	0.0336442	0.029297	S100A10/MYADM/NAXE	3
GO:0010770	positive regulation of cell morphogenesis involved in differentiation	6/131	157/18866	0.000802022	0.0349919	0.0304706	S100A10/ARPC2/MYADM/C1QBP/FLNA/PRKDC	6
GO:0008154	actin polymerization or depolymerization	7/131	221/18866	0.000900031	0.0381606	0.0332298	CAPG/COTL1/ARPC2/MYADM/WASF2/TTC17/ARPC5L	7
GO:0034113	heterotypic cell-cell adhesion	4/131	62/18866	0.000907042	0.0381606	0.0332298	CD47/CD44/MYADM/ITGA4	4
GO:0043467	regulation of generation of precursor metabolites and energy	6/131	162/18866	0.000944016	0.0383468	0.0333919	ISCU/NCOR1/RUBCNL/PRELID1/STAT3/INPP5K	6
GO:1903579	negative regulation of ATP metabolic process	3/131	28/18866	0.000944021	0.0383468	0.0333919	TSPO/NCOR1/STAT3	3
GO:0022407	regulation of cell-cell adhesion	10/131	439/18866	0.000990629	0.039558	0.0344467	JAK1/CD47/CD55/CD44/MYADM/TMEM131L/PAK2/ADAM19/ALOX5/ITGA4	10
GO:0001885	endothelial cell development	4/131	64/18866	0.00102213	0.0401356	0.0349497	GPX1/MYADM/CLIC4/PPP1R16B	4
GO:0002449	lymphocyte mediated immunity	9/131	366/18866	0.00104555	0.0403824	0.0351645	CD55/C1QBP/IGLC2/IGLC3/IGLV1-51/IGKV1-17/IGLV2-14/NCR3/IGKV4-1	9
GO:0051495	positive regulation of cytoskeleton organization	7/131	230/18866	0.00113497	0.043129	0.0375563	S100A10/ARPC2/CD47/WASF2/RANBP1/FLNA/ARPC5L	7
GO:0062125	regulation of mitochondrial gene expression	3/131	30/18866	0.00115815	0.0433113	0.037715	CHCHD10/C1QBP/LRPPRC	3
GO:0051258	protein polymerization	8/131	300/18866	0.00119009	0.0438101	0.0381493	CAPG/GPX4/COTL1/ARPC2/MYADM/WASF2/TTC17/ARPC5L	8
GO:0051497	negative regulation of stress fiber assembly	3/131	31/18866	0.00127577	0.0462417	0.0402668	PAK2/WASF2/INPP5K	3
GO:0002440	production of molecular mediator of immune response	8/131	306/18866	0.00134962	0.0479559	0.0417594	CD55/VPREB3/IGKV1-9/IGLV1-51/PRKDC/IGKV1-17/IGLV2-14/IGKV4-1	8
GO:0030833	regulation of actin filament polymerization	6/131	174/18866	0.00136377	0.0479559	0.0417594	CAPG/COTL1/ARPC2/MYADM/WASF2/ARPC5L	6
GO:2000116	regulation of cysteine-type endopeptidase activity	7/131	239/18866	0.00141562	0.049047	0.0427096	GPX1/CAST/HERPUD1/CD44/PAK2/ANP32B/PDCD5	7
SM1 up-regulated gene (PD vs HC)
GO:0050851	antigen receptor-mediated signaling pathway	4/10	325/18866	1.67283e-05	0.00610584	0.00332806	HLA-DRB5/IGHA1/IGHM/HLA-DQA2	4
GO:0051592	response to calcium ion	3/10	147/18866	5.34332e-05	0.00707739	0.00385761	JUNB/DUSP1/JUN	3
GO:0002429	immune response-activating cell surface receptor signaling pathway	4/10	481/18866	7.75604e-05	0.00707739	0.00385761	HLA-DRB5/IGHA1/IGHM/HLA-DQA2	4
GO:0002757	immune response-activating signal transduction	4/10	481/18866	7.75604e-05	0.00707739	0.00385761	HLA-DRB5/IGHA1/IGHM/HLA-DQA2	4
GO:0019731	antibacterial humoral response	2/10	59/18866	0.000425751	0.0310798	0.0169404	IGHA1/IGHM	2
GO:0010038	response to metal ion	3/10	366/18866	0.000785262	0.0400248	0.021816	JUNB/DUSP1/JUN	3
GO:0071277	cellular response to calcium ion	2/10	83/18866	0.000841045	0.0400248	0.021816	JUNB/JUN	2
GO:0006910	phagocytosis, recognition	2/10	88/18866	0.000944745	0.0400248	0.021816	IGHA1/IGHM	2
GO:0060333	interferon-gamma-mediated signaling pathway	2/10	91/18866	0.00100978	0.0400248	0.021816	HLA-DRB5/HLA-DQA2	2
GO:0019886	antigen processing and presentation of exogenous peptide antigen via MHC class II	2/10	99/18866	0.0011935	0.0400248	0.021816	HLA-DRB5/HLA-DQA2	2
GO:0002495	antigen processing and presentation of peptide antigen via MHC class II	2/10	103/18866	0.00129094	0.0400248	0.021816	HLA-DRB5/HLA-DQA2	2
GO:0002504	antigen processing and presentation of peptide or polysaccharide antigen via MHC class II	2/10	104/18866	0.00131588	0.0400248	0.021816	HLA-DRB5/HLA-DQA2	2
GO:0006911	phagocytosis, engulfment	2/10	126/18866	0.00192276	0.0493682	0.0269087	IGHA1/IGHM	2
GO:0050853	B cell receptor signaling pathway	2/10	135/18866	0.00220281	0.0493682	0.0269087	IGHA1/IGHM	2
GO:0099024	plasma membrane invagination	2/10	135/18866	0.00220281	0.0493682	0.0269087	IGHA1/IGHM	2
GO:0019730	antimicrobial humoral response	2/10	137/18866	0.00226753	0.0493682	0.0269087	IGHA1/IGHM	2
GO:0006958	complement activation, classical pathway	2/10	141/18866	0.00239965	0.0493682	0.0269087	IGHA1/IGHM	2
GO:0010324	membrane invagination	2/10	143/18866	0.00246706	0.0493682	0.0269087	IGHA1/IGHM	2
GO:0042542	response to hydrogen peroxide	2/10	146/18866	0.00256985	0.0493682	0.0269087	DUSP1/JUN	2
SM1 down-regulated gene (PD vs HC)
GO:0051293	establishment of spindle localization	3/14	45/18866	4.53193e-06	0.00179887	0.00108155	MYH9/MAP4/ITGB1	3
GO:0051653	spindle localization	3/14	50/18866	6.24606e-06	0.00179887	0.00108155	MYH9/MAP4/ITGB1	3
GO:0000212	meiotic spindle organization	2/14	13/18866	3.97011e-05	0.00762262	0.00458305	ATRX/MYH9	2
GO:0030010	establishment of cell polarity	3/14	141/18866	0.00014004	0.0201657	0.0121245	MYH9/MAP4/ITGB1	3
GO:0007051	spindle organization	3/14	183/18866	0.000302061	0.0304849	0.0183288	ATRX/MYH9/MAP4	3
GO:0051294	establishment of spindle orientation	2/14	36/18866	0.000317551	0.0304849	0.0183288	MAP4/ITGB1	2
GO:0007163	establishment or maintenance of cell polarity	3/14	220/18866	0.000517809	0.0426083	0.0256179	MYH9/MAP4/ITGB1	3
SM2 up-regulated gene (PD vs HC)
GO:0035994	response to muscle stretch	3/13	18/18866	2.07322e-07	0.000132479	6.76525e-05	NFKBIA/JUN/FOS	3
GO:0051592	response to calcium ion	4/13	147/18866	2.39534e-06	0.000530019	0.000270663	JUN/JUNB/DUSP1/FOS	4
GO:1902895	positive regulation of pri-miRNA transcription by RNA polymerase II	3/13	40/18866	2.48835e-06	0.000530019	0.000270663	JUN/EGR1/FOS	3
GO:1902893	regulation of pri-miRNA transcription by RNA polymerase II	3/13	51/18866	5.22202e-06	0.000750131	0.000383066	JUN/EGR1/FOS	3
GO:0061614	pri-miRNA transcription by RNA polymerase II	3/13	53/18866	5.86957e-06	0.000750131	0.000383066	JUN/EGR1/FOS	3
GO:0000302	response to reactive oxygen species	4/13	235/18866	1.53612e-05	0.00163597	0.000835435	JUN/DUSP1/RHOB/FOS	4
GO:0071277	cellular response to calcium ion	3/13	83/18866	2.27482e-05	0.00207659	0.00106044	JUN/JUNB/FOS	3
GO:1901216	positive regulation of neuron death	3/13	97/18866	3.63007e-05	0.00289952	0.00148069	JUN/EGR1/FOS	3
GO:0010038	response to metal ion	4/13	366/18866	8.67318e-05	0.00615796	0.00314466	JUN/JUNB/DUSP1/FOS	4
GO:0035970	peptidyl-threonine dephosphorylation	2/13	22/18866	0.000100467	0.00641983	0.00327839	DUSP1/DUSP2	2
GO:0042542	response to hydrogen peroxide	3/13	146/18866	0.000122674	0.00712626	0.00363914	JUN/DUSP1/RHOB	3
GO:0000188	inactivation of MAPK activity	2/13	26/18866	0.00014113	0.00751517	0.00383774	DUSP1/DUSP2	2
GO:0030099	myeloid cell differentiation	4/13	431/18866	0.00016306	0.00768318	0.00392354	NFKBIA/JUN/JUNB/FOS	4
GO:0009314	response to radiation	4/13	447/18866	0.000187586	0.00768318	0.00392354	DUSP1/RHOB/EGR1/FOS	4
GO:0038095	Fc-epsilon receptor signaling pathway	3/13	169/18866	0.000189061	0.00768318	0.00392354	JUN/FOS/IGLC2	3
GO:0034614	cellular response to reactive oxygen species	3/13	170/18866	0.00019238	0.00768318	0.00392354	JUN/RHOB/FOS	3
GO:0006979	response to oxidative stress	4/13	458/18866	0.000205933	0.00774065	0.00395289	JUN/DUSP1/RHOB/FOS	4
GO:0019083	viral transcription	3/13	178/18866	0.000220311	0.00782104	0.00399394	RPS26/RPL23A/JUN	3
GO:0071248	cellular response to metal ion	3/13	193/18866	0.000279527	0.00920556	0.00470097	JUN/JUNB/FOS	3
GO:0019080	viral gene expression	3/13	195/18866	0.000288124	0.00920556	0.00470097	RPS26/RPL23A/JUN	3
GO:0071276	cellular response to cadmium ion	2/13	38/18866	0.000303854	0.00924585	0.00472154	JUN/FOS	2
GO:0090184	positive regulation of kidney development	2/13	40/18866	0.000336873	0.00953466	0.00486903	CD24/EGR1	2
GO:0009612	response to mechanical stimulus	3/13	209/18866	0.000353134	0.00953466	0.00486903	NFKBIA/JUN/FOS	3
GO:0002573	myeloid leukocyte differentiation	3/13	210/18866	0.000358109	0.00953466	0.00486903	JUN/JUNB/FOS	3
GO:0071241	cellular response to inorganic substance	3/13	221/18866	0.000415853	0.0106292	0.00542798	JUN/JUNB/FOS	3
GO:0009409	response to cold	2/13	48/18866	0.000485658	0.011936	0.00609531	NFKBIA/FOS	2
GO:0038093	Fc receptor signaling pathway	3/13	241/18866	0.0005356	0.0126759	0.00647314	JUN/FOS/IGLC2	3
GO:0043392	negative regulation of DNA binding	2/13	53/18866	0.000592144	0.0135136	0.00690092	NFKBIA/JUN	2
GO:0001706	endoderm formation	2/13	55/18866	0.000637627	0.0140498	0.00717475	DUSP1/DUSP2	2
GO:0090183	regulation of kidney development	2/13	56/18866	0.000660986	0.014079	0.00718967	CD24/EGR1	2
GO:0045637	regulation of myeloid cell differentiation	3/13	263/18866	0.000690713	0.0141566	0.00722928	NFKBIA/JUN/FOS	3
GO:0002763	positive regulation of myeloid leukocyte differentiation	2/13	58/18866	0.000708936	0.0141566	0.00722928	JUN/FOS	2
GO:0032835	glomerulus development	2/13	64/18866	0.000862605	0.0162119	0.00827887	CD24/EGR1	2
GO:0046686	response to cadmium ion	2/13	64/18866	0.000862605	0.0162119	0.00827887	JUN/FOS	2
GO:0071479	cellular response to ionizing radiation	2/13	68/18866	0.000973195	0.0177678	0.0090734	RHOB/EGR1	2
GO:0035914	skeletal muscle cell differentiation	2/13	69/18866	0.00100186	0.017783	0.00908115	EGR1/FOS	2
GO:0034599	cellular response to oxidative stress	3/13	310/18866	0.00111204	0.0192052	0.00980743	JUN/RHOB/FOS	3
GO:1901214	regulation of neuron death	3/13	321/18866	0.00122966	0.0204267	0.0104312	JUN/EGR1/FOS	3
GO:0060395	SMAD protein signal transduction	2/13	78/18866	0.00127795	0.0204267	0.0104312	JUN/FOS	2
GO:0007492	endoderm development	2/13	79/18866	0.00131063	0.0204267	0.0104312	DUSP1/DUSP2	2
GO:0043407	negative regulation of MAP kinase activity	2/13	79/18866	0.00131063	0.0204267	0.0104312	DUSP1/DUSP2	2
GO:0043405	regulation of MAP kinase activity	3/13	342/18866	0.00147555	0.0219273	0.0111976	CD24/DUSP1/DUSP2	3
GO:0090150	establishment of protein localization to membrane	3/13	342/18866	0.00147555	0.0219273	0.0111976	RPS26/RPL23A/CD24	3
GO:0002237	response to molecule of bacterial origin	3/13	356/18866	0.00165556	0.0232408	0.0118683	NFKBIA/CD24/FOS	3
GO:0007178	transmembrane receptor protein serine/threonine kinase signaling pathway	3/13	359/18866	0.00169585	0.0232408	0.0118683	JUN/EGR1/FOS	3
GO:0062197	cellular response to chemical stress	3/13	360/18866	0.00170942	0.0232408	0.0118683	JUN/RHOB/FOS	3
GO:0070997	neuron death	3/13	360/18866	0.00170942	0.0232408	0.0118683	JUN/EGR1/FOS	3
GO:0051591	response to cAMP	2/13	94/18866	0.00184859	0.0246093	0.0125671	DUSP1/FOS	2
GO:0030316	osteoclast differentiation	2/13	98/18866	0.00200702	0.0261732	0.0133658	JUNB/FOS	2
GO:0045639	positive regulation of myeloid cell differentiation	2/13	101/18866	0.00212995	0.0272048	0.0138926	JUN/FOS	2
GO:0035335	peptidyl-tyrosine dephosphorylation	2/13	103/18866	0.00221385	0.0272048	0.0138926	DUSP1/DUSP2	2
GO:0070498	interleukin-1-mediated signaling pathway	2/13	103/18866	0.00221385	0.0272048	0.0138926	NFKBIA/EGR1	2
GO:0006614	SRP-dependent cotranslational protein targeting to membrane	2/13	105/18866	0.0022993	0.0277218	0.0141566	RPS26/RPL23A	2
GO:0006613	cotranslational protein targeting to membrane	2/13	109/18866	0.00247485	0.0287532	0.0146833	RPS26/RPL23A	2
GO:0043618	regulation of transcription from RNA polymerase II promoter in response to stress	2/13	109/18866	0.00247485	0.0287532	0.0146833	JUN/EGR1	2
GO:0043620	regulation of DNA-templated transcription in response to stress	2/13	115/18866	0.00274972	0.0313763	0.0160228	JUN/EGR1	2
GO:0000184	nuclear-transcribed mRNA catabolic process, nonsense-mediated decay	2/13	120/18866	0.00298931	0.0328552	0.016778	RPS26/RPL23A	2
GO:0045047	protein targeting to ER	2/13	120/18866	0.00298931	0.0328552	0.016778	RPS26/RPL23A	2
GO:0001933	negative regulation of protein phosphorylation	3/13	444/18866	0.00310587	0.0328552	0.016778	JUN/DUSP1/DUSP2	3
GO:0002761	regulation of myeloid leukocyte differentiation	2/13	123/18866	0.00313763	0.0328552	0.016778	JUN/FOS	2
GO:0051101	regulation of DNA binding	2/13	124/18866	0.00318783	0.0328552	0.016778	NFKBIA/JUN	2
GO:0072599	establishment of protein localization to endoplasmic reticulum	2/13	124/18866	0.00318783	0.0328552	0.016778	RPS26/RPL23A	2
GO:0051090	regulation of DNA-binding transcription factor activity	3/13	455/18866	0.00332834	0.0333547	0.0170331	NFKBIA/JUN/FOS	3
GO:0001704	formation of primary germ layer	2/13	127/18866	0.00334069	0.0333547	0.0170331	DUSP1/DUSP2	2
GO:0046683	response to organophosphorus	2/13	134/18866	0.00371055	0.0364775	0.0186278	DUSP1/FOS	2
GO:0042326	negative regulation of phosphorylation	3/13	484/18866	0.00396149	0.0383544	0.0195863	JUN/DUSP1/DUSP2	3
GO:0072006	nephron development	2/13	143/18866	0.00421297	0.0395148	0.0201789	CD24/EGR1	2
GO:0010212	response to ionizing radiation	2/13	144/18866	0.00427065	0.0395148	0.0201789	RHOB/EGR1	2
GO:1903706	regulation of hemopoiesis	3/13	498/18866	0.00429191	0.0395148	0.0201789	NFKBIA/JUN/FOS	3
GO:0007612	learning	2/13	145/18866	0.00432869	0.0395148	0.0201789	JUN/FOS	2
GO:0051384	response to glucocorticoid	2/13	147/18866	0.0044459	0.0399556	0.020404	DUSP1/FOS	2
GO:0071901	negative regulation of protein serine/threonine kinase activity	2/13	148/18866	0.00450505	0.0399556	0.020404	DUSP1/DUSP2	2
GO:0014074	response to purine-containing compound	2/13	149/18866	0.00456457	0.0399556	0.020404	DUSP1/FOS	2
GO:0070972	protein localization to endoplasmic reticulum	2/13	152/18866	0.00474533	0.0409766	0.0209254	RPS26/RPL23A	2
GO:0007519	skeletal muscle tissue development	2/13	158/18866	0.00511671	0.0435519	0.0222405	EGR1/FOS	2
GO:1902107	positive regulation of leukocyte differentiation	2/13	159/18866	0.00517988	0.0435519	0.0222405	JUN/FOS	2
GO:0031960	response to corticosteroid	2/13	164/18866	0.00550116	0.0456525	0.0233132	DUSP1/FOS	2
GO:0060538	skeletal muscle organ development	2/13	168/18866	0.00576466	0.0471682	0.0240872	EGR1/FOS	2
GO:0051100	negative regulation of binding	2/13	169/18866	0.00583144	0.0471682	0.0240872	NFKBIA/JUN	2
SM2 down-regulated gene (PD vs HC)
GO:0007229	integrin-mediated signaling pathway	4/17	108/18866	2.28224e-06	0.00168657	0.000963345	MYH9/ITGB1/FLNA/ITGA4	4
GO:0031589	cell-substrate adhesion	5/17	359/18866	1.24376e-05	0.0045957	0.00262499	ITGB1/FLNA/MYADM/ITGA4/IQGAP1	5
GO:0034113	heterotypic cell-cell adhesion	3/17	62/18866	2.22404e-05	0.00506148	0.00289104	ITGB1/MYADM/ITGA4	3
GO:0045785	positive regulation of cell adhesion	5/17	428/18866	2.89983e-05	0.00506148	0.00289104	JAK1/FLNA/MYADM/ITGA4/IQGAP1	5
GO:0021932	hindbrain radial glia guided cell migration	2/17	10/18866	3.42454e-05	0.00506148	0.00289104	ITGB1/FLNA	2
GO:0034109	homotypic cell-cell adhesion	3/17	86/18866	5.93828e-05	0.00731398	0.00417763	JAK1/MYH9/FLNA	3
GO:0021535	cell migration in hindbrain	2/17	15/18866	7.96945e-05	0.00841346	0.00480564	ITGB1/FLNA	2
GO:0033631	cell-cell adhesion mediated by integrin	2/17	17/18866	0.000103114	0.00908983	0.00519197	ITGB1/ITGA4	2
GO:0034446	substrate adhesion-dependent cell spreading	3/17	106/18866	0.000110702	0.00908983	0.00519197	FLNA/MYADM/ITGA4	3
GO:0010811	positive regulation of cell-substrate adhesion	3/17	122/18866	0.000167912	0.0124087	0.00708763	FLNA/MYADM/IQGAP1	3
GO:0050901	leukocyte tethering or rolling	2/17	29/18866	0.000305874	0.0205492	0.0117374	ITGB1/ITGA4	2
GO:0032970	regulation of actin filament-based process	4/17	405/18866	0.000398949	0.0245686	0.0140332	MYH9/FLNA/MYADM/IQGAP1	4
GO:1990138	neuron projection extension	3/17	172/18866	0.000460923	0.0259689	0.0148331	ITGB1/ITGA4/IQGAP1	3
GO:2000273	positive regulation of signaling receptor activity	2/17	37/18866	0.000499632	0.0259689	0.0148331	NCOA3/ITGB1	2
GO:1900026	positive regulation of substrate adhesion-dependent cell spreading	2/17	38/18866	0.00052711	0.0259689	0.0148331	FLNA/MYADM	2
GO:0007369	gastrulation	3/17	189/18866	0.00060674	0.0276764	0.0158083	ITGB1/MYADM/ITGA4	3
GO:0031032	actomyosin structure organization	3/17	200/18866	0.000715199	0.0276764	0.0158083	MYH9/ITGB1/MEF2A	3
GO:0051293	establishment of spindle localization	2/17	45/18866	0.000739556	0.0276764	0.0158083	MYH9/ITGB1	2
GO:0001667	ameboidal-type cell migration	4/17	481/18866	0.000762665	0.0276764	0.0158083	MYH9/ITGB1/ITGA4/IQGAP1	4
GO:0010761	fibroblast migration	2/17	46/18866	0.000772762	0.0276764	0.0158083	ITGB1/IQGAP1	2
GO:0002377	immunoglobulin production	3/17	210/18866	0.000823925	0.0276764	0.0158083	IGLV2-18/IGKV3-15/IGKV1-27	3
GO:0034764	positive regulation of transmembrane transport	3/17	210/18866	0.000823925	0.0276764	0.0158083	ITGB1/MEF2A/FLNA	3
GO:0010810	regulation of cell-substrate adhesion	3/17	217/18866	0.000905975	0.027857	0.0159115	FLNA/MYADM/IQGAP1	3
GO:0051653	spindle localization	2/17	50/18866	0.000912687	0.027857	0.0159115	MYH9/ITGB1	2
GO:0002064	epithelial cell development	3/17	221/18866	0.000955114	0.027857	0.0159115	FLNA/MYADM/IQGAP1	3
GO:0061756	leukocyte adhesion to vascular endothelial cell	2/17	53/18866	0.00102505	0.027857	0.0159115	ITGB1/ITGA4	2
GO:1900024	regulation of substrate adhesion-dependent cell spreading	2/17	53/18866	0.00102505	0.027857	0.0159115	FLNA/MYADM	2
GO:0007160	cell-matrix adhesion	3/17	230/18866	0.00107181	0.027857	0.0159115	ITGB1/ITGA4/IQGAP1	3
GO:0043113	receptor clustering	2/17	56/18866	0.00114374	0.027857	0.0159115	FLNA/ITGA4	2
GO:0060560	developmental growth involved in morphogenesis	3/17	236/18866	0.00115441	0.027857	0.0159115	ITGB1/ITGA4/IQGAP1	3
GO:0048588	developmental cell growth	3/17	237/18866	0.00116856	0.027857	0.0159115	ITGB1/ITGA4/IQGAP1	3
GO:0016358	dendrite development	3/17	247/18866	0.00131614	0.0303945	0.0173609	ITGB1/MEF2A/IQGAP1	3
GO:0070527	platelet aggregation	2/17	62/18866	0.00139997	0.0313508	0.0179071	MYH9/FLNA	2
GO:0030239	myofibril assembly	2/17	67/18866	0.00163255	0.03447	0.0196887	ITGB1/MEF2A	2
GO:0045123	cellular extravasation	2/17	67/18866	0.00163255	0.03447	0.0196887	ITGB1/ITGA4	2
GO:0033627	cell adhesion mediated by integrin	2/17	71/18866	0.00183098	0.0375859	0.0214685	ITGB1/ITGA4	2
GO:0072659	protein localization to plasma membrane	3/17	281/18866	0.00190432	0.038035	0.021725	ITGB1/FLNA/MYADM	3
GO:0051146	striated muscle cell differentiation	3/17	295/18866	0.00218736	0.0425384	0.0242973	MYH9/ITGB1/MEF2A	3
GO:0002440	production of molecular mediator of immune response	3/17	306/18866	0.00242725	0.0459933	0.0262707	IGLV2-18/IGKV3-15/IGKV1-27	3
GO:0071277	cellular response to calcium ion	2/17	83/18866	0.0024915	0.0460305	0.0262919	MEF2A/IQGAP1	2
PC up-regulated gene (PD vs HC)
GO:0006612	protein targeting to membrane	3/8	210/18866	7.30666e-05	0.0238928	0.013998	RPL23A/RPS4X/CIB1	3
GO:0090150	establishment of protein localization to membrane	3/8	342/18866	0.000309073	0.0339303	0.0198787	RPL23A/RPS4X/CIB1	3
GO:0045652	regulation of megakaryocyte differentiation	2/8	82/18866	0.000513746	0.0339303	0.0198787	CIB1/HMGB2	2
GO:0006605	protein targeting	3/8	444/18866	0.0006639	0.0339303	0.0198787	RPL23A/RPS4X/CIB1	3
GO:0030219	megakaryocyte differentiation	2/8	100/18866	0.000762825	0.0339303	0.0198787	CIB1/HMGB2	2
GO:0006614	SRP-dependent cotranslational protein targeting to membrane	2/8	105/18866	0.000840527	0.0339303	0.0198787	RPL23A/RPS4X	2
GO:0006613	cotranslational protein targeting to membrane	2/8	109/18866	0.000905337	0.0339303	0.0198787	RPL23A/RPS4X	2
GO:0031109	microtubule polymerization or depolymerization	2/8	117/18866	0.001042	0.0339303	0.0198787	NDE1/CIB1	2
GO:0000184	nuclear-transcribed mRNA catabolic process, nonsense-mediated decay	2/8	120/18866	0.00109565	0.0339303	0.0198787	RPL23A/RPS4X	2
GO:0045047	protein targeting to ER	2/8	120/18866	0.00109565	0.0339303	0.0198787	RPL23A/RPS4X	2
GO:0072599	establishment of protein localization to endoplasmic reticulum	2/8	124/18866	0.00116924	0.0339303	0.0198787	RPL23A/RPS4X	2
GO:0072089	stem cell proliferation	2/8	128/18866	0.00124515	0.0339303	0.0198787	NDE1/HMGB2	2
GO:0070972	protein localization to endoplasmic reticulum	2/8	152/18866	0.0017491	0.0439965	0.0257761	RPL23A/RPS4X	2
GO:0007286	spermatid development	2/8	160/18866	0.0019354	0.0452055	0.0264845	CIB1/HMGB2	2
GO:0048515	spermatid differentiation	2/8	166/18866	0.0020811	0.045368	0.0265797	CIB1/HMGB2	2
GO:0019083	viral transcription	2/8	178/18866	0.00238774	0.0487994	0.02859	RPL23A/RPS4X	2
PC down-regulated gene (PD vs HC)
GO:0034975	protein folding in endoplasmic reticulum	5/82	10/18866	3.39581e-10	6.41128e-07	5.88011e-07	CANX/DNAJC3/ERO1A/CALR/HSP90B1	5
GO:0030968	endoplasmic reticulum unfolded protein response	8/82	125/18866	7.00776e-08	6.61532e-05	6.06724e-05	CANX/DNAJC3/ERO1A/PDIA5/CALR/HSP90B1/SELENOS/VCP	8
GO:0034620	cellular response to unfolded protein	8/82	146/18866	2.33228e-07	0.000146778	0.000134618	CANX/DNAJC3/ERO1A/PDIA5/CALR/HSP90B1/SELENOS/VCP	8
GO:0034976	response to endoplasmic reticulum stress	10/82	294/18866	5.76501e-07	0.000234892	0.000215431	CANX/DNAJC3/ERO1A/PDIA5/FLOT1/CALR/HSP90B1/SEC61B/SELENOS/VCP	10
GO:0035967	cellular response to topologically incorrect protein	8/82	166/18866	6.22066e-07	0.000234892	0.000215431	CANX/DNAJC3/ERO1A/PDIA5/CALR/HSP90B1/SELENOS/VCP	8
GO:0006986	response to unfolded protein	8/82	183/18866	1.29953e-06	0.000408917	0.000375039	CANX/DNAJC3/ERO1A/PDIA5/CALR/HSP90B1/SELENOS/VCP	8
GO:0035966	response to topologically incorrect protein	8/82	205/18866	3.03485e-06	0.000818543	0.000750727	CANX/DNAJC3/ERO1A/PDIA5/CALR/HSP90B1/SELENOS/VCP	8
GO:0006457	protein folding	8/82	230/18866	7.08906e-06	0.0013683	0.00125494	CANX/DNAJC3/ERO1A/RANBP2/PDIA5/CALR/HSP90B1/VCP	8
GO:0030970	retrograde protein transport, ER to cytosol	4/82	29/18866	7.24735e-06	0.0013683	0.00125494	HSP90B1/SEC61B/SELENOS/VCP	4
GO:1903513	endoplasmic reticulum to cytosol transport	4/82	29/18866	7.24735e-06	0.0013683	0.00125494	HSP90B1/SEC61B/SELENOS/VCP	4
GO:0007520	myoblast fusion	4/82	45/18866	4.31236e-05	0.00740158	0.00678836	MYH9/CAPN2/FLOT1/CFLAR	4
GO:0032527	protein exit from endoplasmic reticulum	4/82	49/18866	6.05191e-05	0.00952167	0.0087328	HSP90B1/SEC61B/SELENOS/VCP	4
GO:1901739	regulation of myoblast fusion	3/82	22/18866	0.00011482	0.0148072	0.0135804	CAPN2/FLOT1/CFLAR	3
GO:0000768	syncytium formation by plasma membrane fusion	4/82	58/18866	0.000117642	0.0148072	0.0135804	MYH9/CAPN2/FLOT1/CFLAR	4
GO:0140253	cell-cell fusion	4/82	58/18866	0.000117642	0.0148072	0.0135804	MYH9/CAPN2/FLOT1/CFLAR	4
GO:0006949	syncytium formation	4/82	60/18866	0.000134324	0.0158502	0.014537	MYH9/CAPN2/FLOT1/CFLAR	4
GO:0051208	sequestering of calcium ion	5/82	124/18866	0.000206001	0.0228782	0.0209827	MYO5A/ERO1A/CALR/HSP90B1/IBTK	5
GO:0060142	regulation of syncytium formation by plasma membrane fusion	3/82	30/18866	0.000295213	0.0309646	0.0283992	CAPN2/FLOT1/CFLAR	3
GO:0051651	maintenance of location in cell	6/82	216/18866	0.000356679	0.0349573	0.0320611	MYO5A/ERO1A/KDELR2/CALR/HSP90B1/IBTK	6
GO:0030433	ubiquitin-dependent ERAD pathway	4/82	78/18866	0.000370311	0.0349573	0.0320611	HSP90B1/SEC61B/SELENOS/VCP	4

## Sheet: KEGG annotation
ID	Description	GeneRatio	BgRatio	pvalue	p.adjust	qvalue	geneID	Count
USM1 up-regulated gene (PD vs HC)
hsa05140	Leishmaniasis	2/5	77/8105	0.000874567	0.0252358	0.0159384	653361/3118	2
hsa04640	Hematopoietic cell lineage	2/5	99/8105	0.00144205	0.0252358	0.0159384	100133941/3118	2
hsa04145	Phagosome	2/5	152/8105	0.00336677	0.0317913	0.0200787	653361/3118	2
hsa03010	Ribosome	2/5	158/8105	0.00363329	0.0317913	0.0200787	6231/6147	2
USM1 down-regulated gene (PD vs HC)
USM2 up-regulated gene (PD vs HC)
hsa04662	B cell receptor signaling pathway	7/30	82/8105	1.41171e-08	1.63759e-06	1.08479e-06	973/971/10288/2353/930/23547/3725	7
hsa05140	Leishmaniasis	5/30	77/8105	8.03355e-06	0.000465946	0.000308658	3127/3118/3115/2353/3725	5
hsa04658	Th1 and Th2 cell differentiation	5/30	92/8105	1.9236e-05	0.00058802	0.000389523	3127/3118/3115/2353/3725	5
hsa05323	Rheumatoid arthritis	5/30	93/8105	2.02766e-05	0.00058802	0.000389523	3127/3118/3115/2353/3725	5
hsa04659	Th17 cell differentiation	5/30	107/8105	4.00034e-05	0.00092808	0.00061479	3127/3118/3115/2353/3725	5
hsa05321	Inflammatory bowel disease	4/30	65/8105	8.82816e-05	0.00170678	0.00113062	3127/3118/3115/3725	4
hsa04612	Antigen processing and presentation	4/30	78/8105	0.000179886	0.00278147	0.00184253	3127/3118/3115/3308	4
hsa05310	Asthma	3/30	31/8105	0.000191825	0.00278147	0.00184253	3127/3118/3115	3
hsa05330	Allograft rejection	3/30	38/8105	0.000353771	0.00455971	0.0030205	3127/3118/3115	3
hsa04640	Hematopoietic cell lineage	4/30	99/8105	0.000449791	0.00494075	0.00327291	3127/3118/3115/930	4
hsa05332	Graft-versus-host disease	3/30	42/8105	0.000476641	0.00494075	0.00327291	3127/3118/3115	3
hsa04940	Type I diabetes mellitus	3/30	43/8105	0.000511112	0.00494075	0.00327291	3127/3118/3115	3
hsa04672	Intestinal immune network for IgA production	3/30	49/8105	0.000751707	0.00650256	0.0043075	3127/3118/3115	3
hsa05169	Epstein-Barr virus infection	5/30	202/8105	0.000784792	0.00650256	0.0043075	3127/3118/3115/930/3725	5
hsa05320	Autoimmune thyroid disease	3/30	53/8105	0.000946303	0.00731808	0.00484773	3127/3118/3115	3
hsa05166	Human T-cell leukemia virus 1 infection	5/30	219/8105	0.00112927	0.00807357	0.00534819	3127/3118/3115/2353/3725	5
hsa04380	Osteoclast differentiation	4/30	128/8105	0.0011832	0.00807357	0.00534819	10288/2353/23547/3725	4
hsa05416	Viral myocarditis	3/30	60/8105	0.00135842	0.00875425	0.0057991	3127/3118/3115	3
hsa05132	Salmonella infection	5/30	249/8105	0.0019964	0.0121885	0.00807407	2353/10376/3725/388/27128	5
hsa04145	Phagosome	4/30	152/8105	0.00222897	0.012928	0.00856393	3127/3118/3115/10376	4
hsa04010	MAPK signaling pathway	5/30	294/8105	0.00410239	0.0226608	0.0150113	1843/2353/3164/3725/3925	5
hsa05150	Staphylococcus aureus infection	3/30	96/8105	0.0051858	0.0273433	0.0181131	3127/3118/3115	3
hsa05130	Pathogenic Escherichia coli infection	4/30	197/8105	0.00565499	0.0285208	0.0188931	2353/10376/3725/27128	4
hsa05145	Toxoplasmosis	3/30	112/8105	0.00795008	0.0384254	0.0254542	3127/3118/3115	3
hsa05340	Primary immunodeficiency	2/30	38/8105	0.00857214	0.0397747	0.026348	973/930	2
hsa05171	Coronavirus disease - COVID-19	4/30	232/8105	0.00999037	0.0445724	0.0295262	6231/6147/2353/3725	4
USM2 down-regulated gene (PD vs HC)
hsa05135	Yersinia infection	7/63	137/8105	8.49908e-05	0.0104615	0.00859615	60/10109/10163/3676/5293/81873/4792	7
hsa05131	Shigellosis	9/63	246/8105	0.00010675	0.0104615	0.00859615	60/10109/831/11345/960/10163/5293/81873/4792	9
hsa05100	Bacterial invasion of epithelial cells	5/63	77/8105	0.000310394	0.0202791	0.0166633	60/10109/10163/5293/81873	5
hsa05235	PD-L1 expression and PD-1 checkpoint pathway in cancer	5/63	89/8105	0.000607153	0.0249546	0.0205051	3716/6774/3460/5293/4792	5
hsa05132	Salmonella infection	8/63	249/8105	0.000636597	0.0249546	0.0205051	60/6281/10109/79026/2316/5293/81873/4792	8
hsa04666	Fc gamma R-mediated phagocytosis	5/63	97/8105	0.000898909	0.0293644	0.0241286	10109/10163/5293/81873/4082	5
hsa04810	Regulation of actin cytoskeleton	7/63	218/8105	0.00142365	0.0398622	0.0327547	60/10109/5062/10163/3676/5293/81873	7
hsa05145	Toxoplasmosis	5/63	112/8105	0.00171177	0.0419382	0.0344605	3716/6774/3460/240/4792	5
SM1 up-regulated gene (PD vs HC)
hsa05321	Inflammatory bowel disease	3/6	65/8105	9.67985e-06	0.000527862	0.000322874	3127/3118/3725	3
hsa05140	Leishmaniasis	3/6	77/8105	1.61564e-05	0.000527862	0.000322874	3127/3118/3725	3
hsa04658	Th1 and Th2 cell differentiation	3/6	92/8105	2.76204e-05	0.000527862	0.000322874	3127/3118/3725	3
hsa05323	Rheumatoid arthritis	3/6	93/8105	2.85331e-05	0.000527862	0.000322874	3127/3118/3725	3
hsa04659	Th17 cell differentiation	3/6	107/8105	4.34724e-05	0.000643392	0.00039354	3127/3118/3725	3
hsa05310	Asthma	2/6	31/8105	0.000210365	0.0025945	0.00158696	3127/3118	2
hsa05169	Epstein-Barr virus infection	3/6	202/8105	0.000288611	0.00273734	0.00167433	3127/3118/3725	3
hsa05330	Allograft rejection	2/6	38/8105	0.000317302	0.00273734	0.00167433	3127/3118	2
hsa05166	Human T-cell leukemia virus 1 infection	3/6	219/8105	0.000366446	0.00273734	0.00167433	3127/3118/3725	3
hsa05332	Graft-versus-host disease	2/6	42/8105	0.000388104	0.00273734	0.00167433	3127/3118	2
hsa04940	Type I diabetes mellitus	2/6	43/8105	0.000406902	0.00273734	0.00167433	3127/3118	2
hsa04672	Intestinal immune network for IgA production	2/6	49/8105	0.000528871	0.00326137	0.00199486	3127/3118	2
hsa05320	Autoimmune thyroid disease	2/6	53/8105	0.000618897	0.00352295	0.00215486	3127/3118	2
hsa05416	Viral myocarditis	2/6	60/8105	0.00079312	0.00419221	0.00256422	3127/3118	2
hsa04612	Antigen processing and presentation	2/6	78/8105	0.00133764	0.00659902	0.00403639	3127/3118	2
hsa05150	Staphylococcus aureus infection	2/6	96/8105	0.00201913	0.00933848	0.00571201	3127/3118	2
hsa04640	Hematopoietic cell lineage	2/6	99/8105	0.00214585	0.00934077	0.00571342	3127/3118	2
hsa04668	TNF signaling pathway	2/6	112/8105	0.00273786	0.0106633	0.00652233	3726/3725	2
hsa05145	Toxoplasmosis	2/6	112/8105	0.00273786	0.0106633	0.00652233	3127/3118	2
hsa04380	Osteoclast differentiation	2/6	128/8105	0.00356109	0.013176	0.00805932	3726/3725	2
hsa05322	Systemic lupus erythematosus	2/6	136/8105	0.00401135	0.0140828	0.00861396	3127/3118	2
hsa05418	Fluid shear stress and atherosclerosis	2/6	139/8105	0.00418678	0.0140828	0.00861396	1843/3725	2
hsa04514	Cell adhesion molecules	2/6	149/8105	0.00479728	0.01538	0.00940738	3127/3118	2
hsa04145	Phagosome	2/6	152/8105	0.0049881	0.01538	0.00940738	3127/3118	2
hsa05164	Influenza A	2/6	172/8105	0.00634975	0.0187953	0.0114964	3127/3118	2
hsa05152	Tuberculosis	2/6	180/8105	0.00693752	0.0197452	0.0120775	3127/3118	2
hsa05171	Coronavirus disease - COVID-19	2/6	232/8105	0.0113414	0.0310839	0.0190129	6231/3725	2
hsa04010	MAPK signaling pathway	2/6	294/8105	0.0178568	0.0471928	0.0288662	1843/3725	2
SM1 down-regulated gene (PD vs HC)
SM2 up-regulated gene (PD vs HC)
hsa05171	Coronavirus disease - COVID-19	5/11	232/8105	7.38797e-06	0.000423331	0.000178245	6231/6147/4792/3725/2353	5
hsa04668	TNF signaling pathway	4/11	112/8105	1.05833e-05	0.000423331	0.000178245	4792/3725/3726/2353	4
hsa04380	Osteoclast differentiation	4/11	128/8105	1.79766e-05	0.000479377	0.000201843	4792/3725/3726/2353	4
hsa05140	Leishmaniasis	3/11	77/8105	0.000128795	0.00193387	0.000814262	4792/3725/2353	3
hsa05166	Human T-cell leukemia virus 1 infection	4/11	219/8105	0.00014742	0.00193387	0.000814262	4792/3725/1958/2353	4
hsa04662	B cell receptor signaling pathway	3/11	82/8105	0.000155349	0.00193387	0.000814262	4792/3725/2353	3
hsa05235	PD-L1 expression and PD-1 checkpoint pathway in cancer	3/11	89/8105	0.000198176	0.00193387	0.000814262	4792/3725/2353	3
hsa04658	Th1 and Th2 cell differentiation	3/11	92/8105	0.000218656	0.00193387	0.000814262	4792/3725/2353	3
hsa04657	IL-17 signaling pathway	3/11	94/8105	0.000233046	0.00193387	0.000814262	4792/3725/2353	3
hsa05132	Salmonella infection	4/11	249/8105	0.000242026	0.00193387	0.000814262	4792/3725/388/2353	4
hsa05142	Chagas disease	3/11	102/8105	0.000296742	0.00193387	0.000814262	4792/3725/2353	3
hsa04620	Toll-like receptor signaling pathway	3/11	104/8105	0.000314254	0.00193387	0.000814262	4792/3725/2353	3
hsa04660	T cell receptor signaling pathway	3/11	104/8105	0.000314254	0.00193387	0.000814262	4792/3725/2353	3
hsa04659	Th17 cell differentiation	3/11	107/8105	0.000341759	0.00195291	0.000822276	4792/3725/2353	3
hsa04010	MAPK signaling pathway	4/11	294/8105	0.000457391	0.00243942	0.00102712	3725/1843/1844/2353	4
hsa04926	Relaxin signaling pathway	3/11	129/8105	0.000592006	0.0029455	0.00124021	4792/3725/2353	3
hsa04210	Apoptosis	3/11	136/8105	0.00069093	0.0029455	0.00124021	4792/3725/2353	3
hsa05135	Yersinia infection	3/11	137/8105	0.000705872	0.0029455	0.00124021	4792/3725/2353	3
hsa05162	Measles	3/11	139/8105	0.000736376	0.0029455	0.00124021	4792/3725/2353	3
hsa05418	Fluid shear stress and atherosclerosis	3/11	139/8105	0.000736376	0.0029455	0.00124021	3725/1843/2353	3
hsa05161	Hepatitis B	3/11	162/8105	0.00114946	0.00437889	0.00184374	4792/3725/2353	3
hsa05167	Kaposi sarcoma-associated herpesvirus infection	3/11	193/8105	0.00190488	0.00692682	0.00291656	4792/3725/2353	3
hsa05130	Pathogenic Escherichia coli infection	3/11	197/8105	0.00202038	0.00702741	0.00295891	4792/3725/2353	3
hsa05170	Human immunodeficiency virus 1 infection	3/11	212/8105	0.00249253	0.00808958	0.00340614	4792/3725/2353	3
hsa05417	Lipid and atherosclerosis	3/11	215/8105	0.00259454	0.00808958	0.00340614	4792/3725/2353	3
hsa04024	cAMP signaling pathway	3/11	216/8105	0.00262911	0.00808958	0.00340614	4792/3725/2353	3
hsa05031	Amphetamine addiction	2/11	69/8105	0.00373865	0.0109879	0.00462648	3725/2353	2
hsa05120	Epithelial cell signaling in Helicobacter pylori infection	2/11	70/8105	0.00384576	0.0109879	0.00462648	4792/3725	2
hsa05133	Pertussis	2/11	76/8105	0.00451835	0.0124644	0.00524818	3725/2353	2
hsa05210	Colorectal cancer	2/11	86/8105	0.00575183	0.0153382	0.0064582	3725/2353	2
hsa04912	GnRH signaling pathway	2/11	93/8105	0.00669743	0.0167436	0.00704992	3725/1958	2
hsa05323	Rheumatoid arthritis	2/11	93/8105	0.00669743	0.0167436	0.00704992	3725/2353	2
hsa01522	Endocrine resistance	2/11	98/8105	0.00741356	0.0174437	0.0073447	3725/2353	2
hsa05231	Choline metabolism in cancer	2/11	98/8105	0.00741356	0.0174437	0.0073447	3725/2353	2
hsa04933	AGE-RAGE signaling pathway in diabetic complications	2/11	100/8105	0.0077094	0.0176215	0.00741958	3725/1958	2
hsa04625	C-type lectin receptor signaling pathway	2/11	104/8105	0.00831706	0.0184823	0.00778204	4792/3725	2
hsa04928	Parathyroid hormone synthesis, secretion and action	2/11	106/8105	0.00862881	0.0186569	0.00785553	1958/2353	2
hsa04722	Neurotrophin signaling pathway	2/11	119/8105	0.0107821	0.0221171	0.00931248	4792/3725	2
hsa04935	Growth hormone synthesis, secretion and action	2/11	119/8105	0.0107821	0.0221171	0.00931248	3726/2353	2
hsa04915	Estrogen signaling pathway	2/11	138/8105	0.0143141	0.0286282	0.012054	3725/2353	2
hsa05224	Breast cancer	2/11	147/8105	0.0161414	0.0314953	0.0132612	3725/2353	2
hsa04932	Non-alcoholic fatty liver disease	2/11	150/8105	0.0167719	0.0319465	0.0134512	3725/2353	2
hsa04921	Oxytocin signaling pathway	2/11	154/8105	0.0176291	0.0327984	0.0138099	3725/2353	2
hsa03010	Ribosome	2/11	158/8105	0.018505	0.0336455	0.0141665	6231/6147	2
hsa04621	NOD-like receptor signaling pathway	2/11	181/8105	0.023894	0.0424782	0.0178856	4792/3725	2
SM2 down-regulated gene (PD vs HC)
hsa05140	Leishmaniasis	3/12	77/8105	0.000170554	0.00669937	0.00514906	3716/3688/3676	3
hsa04810	Regulation of actin cytoskeleton	4/12	218/8105	0.000212679	0.00669937	0.00514906	4627/3688/3676/8826	4
hsa04510	Focal adhesion	3/12	201/8105	0.0028018	0.0466722	0.0358717	3688/2316/3676	3
hsa05205	Proteoglycans in cancer	3/12	205/8105	0.00296331	0.0466722	0.0358717	3688/2316/8826	3
PC up-regulated gene (PD vs HC)
hsa03010	Ribosome	2/4	158/8104	0.00220877	0.00883506	0.00232502	6147/6191	2
hsa05171	Coronavirus disease - COVID-19	2/4	232/8104	0.00471335	0.0094267	0.00248071	6147/6191	2
PC down-regulated gene (PD vs HC)
hsa04141	Protein processing in endoplasmic reticulum	10/43	171/8104	1.41342e-08	1.99292e-06	1.83001e-06	821/3703/5611/824/30001/811/7184/10952/55829/7415	10
hsa05110	Vibrio cholerae infection	4/43	50/8104	0.000132552	0.00934493	0.00858101	2778/30001/11014/10952	4
hsa00513	Various types of N-glycan biosynthesis	3/43	39/8104	0.0011133	0.0415081	0.0381149	3703/2530/85365	3
hsa04145	Phagosome	5/43	152/8104	0.00117753	0.0415081	0.0381149	23673/821/3105/811/10952	5
